# Supplementary material
Source: PubMed Central journal article supplement (PMC8672815)
Supplement: MD-012-D1MD00264C-s001.pdf [file MD-012-D1MD00264C-s001.pdf]

## **Supplementary information**

### **Synthesis of low-molecular weight fucoidan derivatives and their binding abilities to the SARS-CoV-2 spike proteins**

Tatsuki Koike, Aoi Sugimoto, Shuhei Kosono, Sumika Komaba, Yuko Kanno, Takashi Kitamura, Itsuki Anzai, Tokiko Watanabe, Daisuke Takahashi\* and Kazunobu Toshima\*

| <b>Contents</b>                                                 | <b>Page</b> |
|-----------------------------------------------------------------|-------------|
| General methods for chemical synthesis                          | S-2         |
| Synthesis of tetrafucoside <b>16</b>                            | S-3         |
| Synthesis of tetrafucoside <b>11</b>                            | S-9         |
| Synthesis of tetrafucoside <b>12</b>                            | S-14        |
| Synthesis of tetrafucosides <b>13</b> and <b>10</b>             | S-18        |
| Materials and methods for biological assay                      | S-22        |
| Expression and purification of recombinant spike proteins       | S-22        |
| Binding affinity of heparin to wild type SARS-CoV-2 S protein   | S-22        |
| Competitive inhibition assay                                    | S-23        |
| Binding affinities of heparin to mutant SARS-CoV-2 S proteins   | S-23        |
| Binding affinities of <b>10</b> to mutant SARS-CoV-2 S proteins | S-23        |
| Coagulation (Factor Xa) assay                                   | S-23        |
| References                                                      | S-24        |
| NMR spectrum charts                                             | S-25        |

## **General methods for chemical synthesis**

NMR spectra were recorded on a JEOL ECA-500 (500 MHz for  $^1\text{H}$ , 125 MHz for  $^{13}\text{C}$ ) spectrometer or a JEOL Lambda-300 (300 MHz for  $^1\text{H}$ ) spectrometer.  $^1\text{H}$ -NMR data are reported as follows; chemical shift in parts per million (ppm) downfield or upfield from  $\text{CDCl}_3$  ( $\delta$  7.26),  $\text{CD}_3\text{OD}$  ( $\delta$  3.31),  $\text{D}_2\text{O}$  ( $\delta$  4.79) or tetramethyl silane ( $\delta$  0.00), integration, multiplicity (br = broad, s = singlet, d = doublet, t = triplet, q = quartet, and m = multiplet), and coupling constants (Hz).  $^{13}\text{C}$ -NMR chemical shifts are reported in ppm downfield or upfield from  $\text{CDCl}_3$  ( $\delta$  77.0),  $\text{CD}_3\text{OD}$  ( $\delta$  49.0) or acetone- $d_6$  ( $\delta$  29.8). ESI-TOF MS spectra were measured on a Waters LCT premier XE. Melting points were determined on a micro hot-stage (Yanako MP-S3) and were uncorrected. Optical rotations were measured on a JASCO P-2200 polarimeter. Silica gel TLC was performed on a Merck TLC 60F-254 (0.25 mm). Column chromatography separation was performed on a Silica Gel 60N (spherical, neutral, 63-210  $\mu\text{m}$  or 40-50  $\mu\text{m}$ ) (Kanto Chemical Co., Inc.). Reverse phase column chromatography separation was performed on a Wakosil 25C18 (Wako pure chemical industries, Ltd.) or Sep-Pak C18 reversed-phase cartridge (Waters). Gel filtration chromatography separations were performed using a Sephadex<sup>TM</sup> LH-20 (GE Healthcare). Air- and/or moisture-sensitive reactions were carried out under an argon atmosphere using oven-dried glassware.

## Synthesis of tetraucoside 16

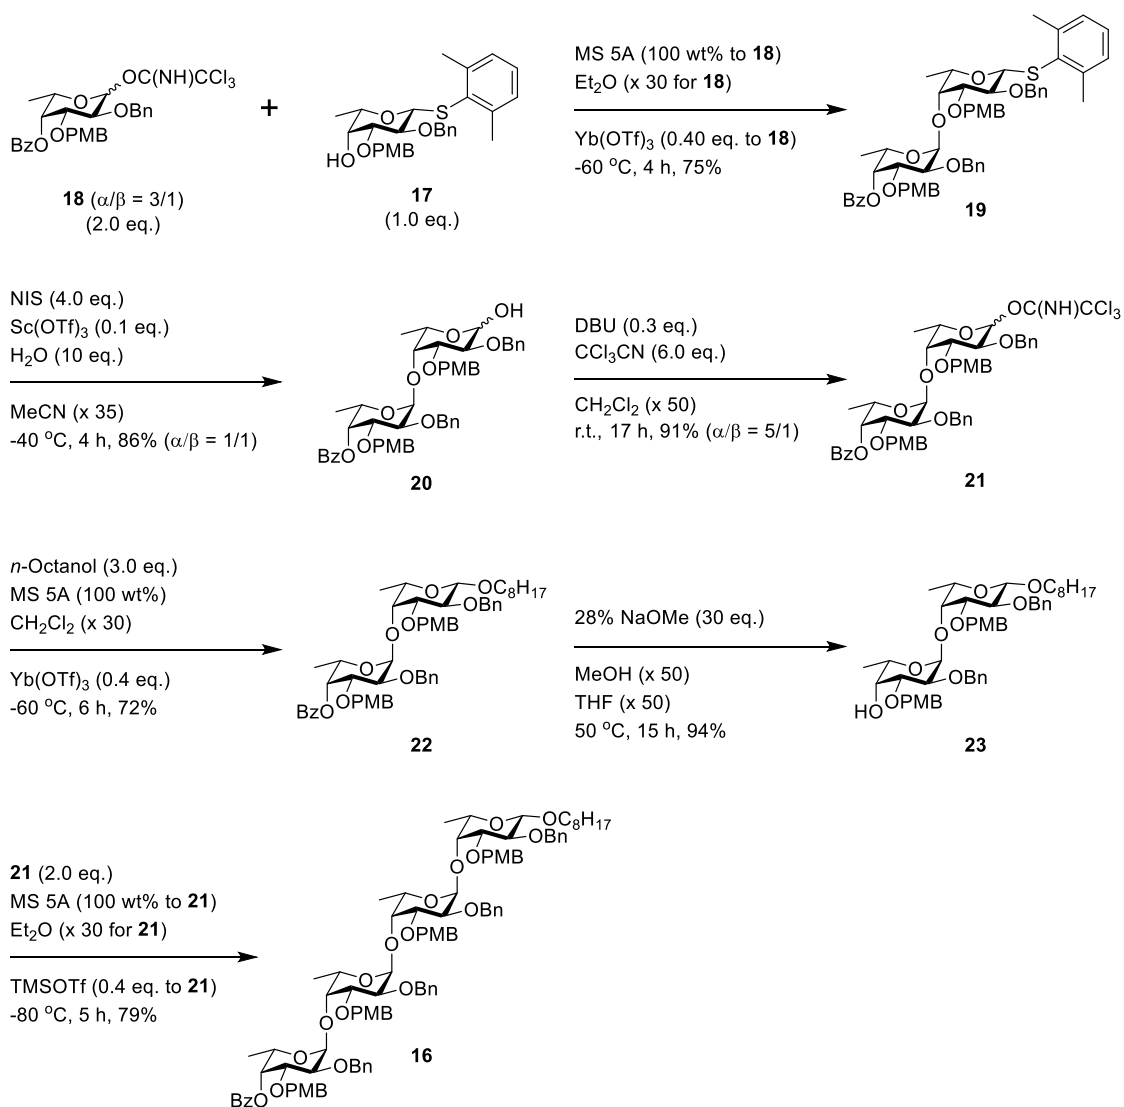

## Compound 19

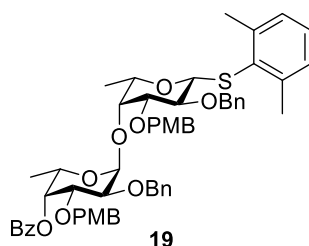

To a solution of **18**<sup>1)</sup> (3.70 g, 5.94 mmol) and **17**<sup>2)</sup> (1.47 g, 2.97 mmol) in Et<sub>2</sub>O (111 mL) was added MS 5A (3.70 g, 100 wt% to **18**) at room temperature. After being stirred at the same temperature for 1 h, the reaction mixture was cooled to -60 °C, and then Yb(OTf)<sub>3</sub> (1.47 g, 2.38 mmol) was added to the reaction mixture. After the reaction mixture was stirred for 4 h at the same temperature, the reaction was quenched with triethylamine (4.0 mL). The resultant mixture was filtered through Celite. And then, water was added to the filtrate. The aqueous layer was extracted with EtOAc (100 mL×3), and then the combined extracts were washed with brine (100 mL), dried over anhydrous Na<sub>2</sub>SO<sub>4</sub>, and concentrated in *vacuo*. The residue was subjected to silica gel column chromatography (15/1 PhMe/EtOAc) to give **19** (2.14 g, 2.24 mmol, 75% yield). White foam; *R<sub>f</sub>* 0.50 (6/1 PhMe/EtOAc); [α]<sub>D</sub><sup>18</sup> -116.7° (*c* 1.0, CHCl<sub>3</sub>); <sup>1</sup>H-NMR (500 MHz, CDCl<sub>3</sub>) δ 8.07-8.05 (2H, m, Ar-H), 7.59-7.55 (1H, m, Ar-H), 7.46-7.43 (4H, m, Ar-H), 7.36-7.22 (12H, m, Ar-H), 7.16-7.08 (3H, m, Ar-H), 6.82-6.78 (4H, m, Ar-H), 5.60 (1H, br-d, *J*<sub>3',4'</sub> = 3.0 Hz, H-4'), 5.02 (1H, d, *J*<sub>1',2'</sub> = 3.5 Hz, H-1'), 5.00 and 4.90 (2H, ABq, *J* = 11.0 Hz, ArCH<sub>2</sub>), 4.90 and 4.80 (2H, ABq, *J* = 11.0 Hz, ArCH<sub>2</sub>), 4.69-4.57 (5H, m, ArCH<sub>2</sub>×2, H-5 or 5'), 4.30 (1H, d, *J*<sub>1,2</sub> = 9.0 Hz, H-1), 4.25 (1H, dd, *J*<sub>2',3'</sub> = 10.5 Hz, *J*<sub>3',4'</sub> = 3.5 Hz, H-3'), 3.98 (1H, dd, *J*<sub>1',2'</sub> = 3.5 Hz, *J*<sub>2',3'</sub> = 10.5 Hz, H-2'), 3.77 (3H, s, OMe), 3.75 (3H, s, OMe), 3.74 (1H, br-d, *J*<sub>3,4</sub> = 3.0 Hz, H-4), 3.67 (1H, t, *J*<sub>1,2</sub> = 9.5 Hz, *J*<sub>2,3</sub> = 9.5 Hz, H-2), 3.38 (1H, dd, *J*<sub>3,4</sub> = 2.5 Hz, *J*<sub>2,3</sub> = 9.0 Hz, H-3), 3.27 (1H, br-q, *J* = 6.0 Hz, H-5 or 5'), 2.58 (6H, s, SPhMe<sub>2</sub>), 1.24 (3H, d, *J* = 6.5 Hz, H-6 or 6'), 0.95 (3H, d, *J* = 6.5 Hz, H-6 or 6'); <sup>13</sup>C-NMR (125 MHz, CDCl<sub>3</sub>) δ 166.3, 159.0, 144.5, 138.8, 138.5, 132.9, 132.4, 130.4, 130.2, 129.9, 129.7, 129.0, 128.7, 128.3×2, 128.2, 128.1, 127.9×2, 127.5, 127.2, 113.7, 113.6, 100.2, 90.1, 82.3, 78.1, 77.3, 75.5, 75.4, 75.3, 74.5, 73.0, 72.3, 71.9, 71.2. 65.5, 55.2×2, 22.7, 16.9, 16.2; HRMS (ESI-TOF) *m/z* 955.4108 (955.4091 calcd. for C<sub>57</sub>H<sub>63</sub>O<sub>11</sub>S, [M+H]<sup>+</sup>).

## Compound 20

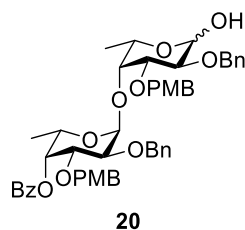

To a solution of **19** (1.21 g, 1.27 mmol) in MeCN (42 mL) and H<sub>2</sub>O (228  $\mu$ L) were added NIS (1.14 g, 5.07 mmol) and Sc(OTf)<sub>3</sub> (63.0 mg, 128  $\mu$ mol) at -40 °C. After being stirred at the same temperature for 4 h, the reaction mixture was poured into a solution of saturated aq. NaHCO<sub>3</sub> (30 mL) and saturated aq. Na<sub>2</sub>S<sub>2</sub>O<sub>3</sub> (30 mL) at 0 °C. The aqueous layer was extracted with EtOAc (200 mL $\times$ 3), and then the combined extracts were washed with brine (600 mL), dried over anhydrous Na<sub>2</sub>SO<sub>4</sub>, and concentrated in *vacuo*. The residue was subjected to silica gel column chromatography (2/1 PhMe/EtOAc) to give **20** (911 mg, 1.09 mmol, 86% yield,  $\alpha/\beta = 1/1$ ). White foam; *R<sub>f</sub>* 0.50 (2/1 PhMe/EtOAc); <sup>1</sup>H-NMR (500 MHz, CDCl<sub>3</sub>)  $\delta$  8.05-8.01 (2H, m, Ar-H), 7.59-7.56 (1H, m, Ar-H), 7.46-7.19 (16H, m, Ar-H), 6.85-6.77 (4H, m, Ar-H), 5.58 (1H, m), 5.34 (1/2H, m), 4.97-4.90 (3/2H, m), 4.86-4.63 (7H, m), 4.56-4.42 (2H, m), 4.13-4.03 (3/2H, m), 3.94-3.86 (3/2H, m), 3.82-3.75 (15/2H, m), 3.61-3.53 (1H, m), 3.44-3.40 (1/2H, m), 3.23 (1/2H, d, *J* = 7.5 Hz), 2.80 (1/2H, s, OH-1), 1.37 (3/2H, d, *J* = 6.5 Hz), 1.32 (3/2H, d, *J* = 6.5 Hz), 0.98-0.93 (3H, m); <sup>13</sup>C-NMR (125 MHz, CDCl<sub>3</sub>)  $\delta$  166.3, 166.2, 159.1 $\times$ 2, 159.0 $\times$ 2, 138.5, 138.4, 138.3, 138.1, 133.0, 130.5, 130.4 $\times$ 2, 130.3, 130.1, 129.8, 129.6, 129.5, 129.1 $\times$ 2, 128.5, 128.4, 128.3 $\times$ 2, 128.2 $\times$ 2, 128.1, 127.9, 127.7, 127.6, 127.5, 113.7, 113.6, 113.5, 100.3, 100.1, 97.7, 91.6, 80.0, 79.8, 78.4, 76.4, 76.3, 76.0, 75.4, 74.9, 74.7, 74.5, 73.8 $\times$ 2, 73.0, 72.3, 71.6, 71.2, 71.1, 67.3, 65.5, 65.4, 55.2 $\times$ 2, 17.0, 16.5, 16.2 $\times$ 2; HRMS (ESI-TOF) *m/z* 835.3700 (835.3694 calcd. for C<sub>49</sub>H<sub>55</sub>O<sub>12</sub>, [M+H]<sup>+</sup>).

## Compound 21

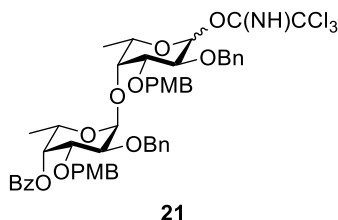

To a solution of **20** (2.70 g, 3.23 mmol) in CH<sub>2</sub>Cl<sub>2</sub> (135 mL) were added DBU (146  $\mu$ L, 0.970 mmol) and CCl<sub>3</sub>CN (1.95 mL, 19.4 mmol) at room temperature. After being stirred at the same temperature for 17 h, the reaction mixture was concentrated in *vacuo*. The residue was subjected to silica gel column chromatography (2/1 *n*-Hexane/EtOAc, 2% NEt<sub>3</sub>) to give **21** (2.90 g, 2.96 mmol, 91% yield,  $\alpha/\beta = 5/1$ ). White foam; *R<sub>f</sub>* 0.60 ( $\alpha$ ), 0.30 ( $\beta$ ) (2/1 *n*-Hexane/EtOAc, 2% NEt<sub>3</sub>);

$^1\text{H-NMR}$  (300 MHz,  $\text{CDCl}_3$ )  $\delta$  8.63 (1/6H, s,  $\text{OC}(\text{NH})\text{CCl}_3$ ), 8.50 (5/6H, s,  $\text{OC}(\text{NH})\text{CCl}_3$ ), 8.06-8.01 (2H, m, Ar-H), 7.60-7.55 (1H, m, Ar-H), 7.47-7.41 (2H, m, Ar-H), 7.39-7.20 (14H, m, Ar-H), 6.83-6.76 (4H, m, Ar-H), 6.60 (5/6H, d,  $J_{1,2} = 2.7$  Hz, H-1), 5.72 (1/6H, d,  $J_{1,2} = 8.1$  Hz, H-1), 5.57 (1H, m, H-4'), 5.01-4.43 (10H, m, H-1', H-5 or 5',  $\text{ArCH}_2$ ), 4.15-3.73 (12H, m, H-2, 2', H-3, 3', H-4, H-5 or 5',  $\text{OMe}\times 2$ ), 1.39 (3/6H, d,  $J = 6.0$  Hz, H-6 or 6'), 1.32 (15/6H, d,  $J = 6.3$  Hz, H-6 or 6'), 0.99-0.93 (3H, m, H-6 or 6');  $^{13}\text{C-NMR}$  (125 MHz,  $\text{CDCl}_3$ )  $\alpha$  isomer :  $\delta$  166.2, 161.3, 159.1, 159.0, 138.4, 138.3, 133.0, 130.4 $\times 2$ , 130.1, 129.8, 129.5 $\times 2$ , 128.4, 128.3, 128.2, 127.6 $\times 2$ , 127.5, 113.6 $\times 2$ , 100.2, 95.1, 91.5, 78.1, 76.3, 75.2, 74.8, 74.7, 73.9, 72.6, 72.3, 71.6, 71.1, 70.1, 65.5, 55.2 $\times 2$ , 16.5, 16.2; HRMS (ESI-TOF)  $m/z$  976.2656 (976.2633 calcd. for  $\text{C}_{51}\text{H}_{53}\text{NO}_{12}\text{Cl}_3$ ,  $[\text{M-H}]^-$ ).

## Compound 22

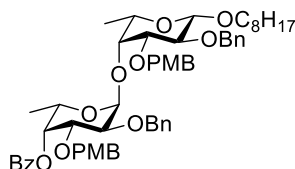

**22**

To a solution of **21** (2.02 g, 2.06 mmol) in  $\text{CH}_2\text{Cl}_2$  (61 mL) were added *n*-octanol (979  $\mu\text{L}$ , 6.18 mmol) and MS 5A (2.02 g, 100 wt% to **21**) at room temperature. After being stirred at the same temperature for 1 h, the reaction mixture was cooled to  $-60$   $^\circ\text{C}$ , and then  $\text{Yb}(\text{OTf})_3$  (512 mg, 0.824 mmol) was added to the reaction mixture. After the reaction mixture was stirred for 6 h at the same temperature, the reaction was quenched with triethylamine (4.0 mL). The resultant mixture was filtered through Celite. And then, water was added to the filtrate. The aqueous layer was extracted with  $\text{EtOAc}$  (200 mL $\times 3$ ), and then the combined extracts were washed with brine (600 mL), dried over anhydrous  $\text{Na}_2\text{SO}_4$ , and concentrated in *vacuo*. The residue was subjected to silica gel column chromatography (15/1  $\text{PhMe}/\text{EtOAc}$ ) to give **22** (1.41 g, 1.48 mmol, 72% yield). Yellow syrup;  $R_f$  0.40 (15/1  $\text{PhMe}/\text{EtOAc}$ );  $[\alpha]_D^{22} -93.7^\circ$  ( $c$  1.0,  $\text{CHCl}_3$ );  $^1\text{H-NMR}$  (500 MHz,  $\text{CDCl}_3$ )  $\delta$  8.04-8.02 (2H, m, Ar-H), 7.58-7.55 (1H, m, Ar-H), 7.46-7.38 (4H, m, Ar-H), 7.35-7.22 (12H, m, Ar-H), 6.82-6.77 (4H, m, Ar-H), 5.56 (1H, br-d,  $J_{3',4'} = 2.0$  Hz, H-4'), 4.97-4.93 (2H, m, H-1',  $\text{ArCH}_2$ ), 4.84-4.62 (6H, m,  $\text{ArCH}_2\times 3$ ), 4.54-4.49 (2H, m, H-5 or 5',  $\text{ArCH}_2$ ), 4.29 (1H, d,  $J_{1,2} = 7.5$  Hz, H-1), 4.17 (1H, dd,  $J_{2',3'} = 10.0$  Hz,  $J_{3',4'} = 3.0$  Hz, H-3'), 3.99-3.90 (2H, m, H-2', - $\text{OCH}_2\text{CH}_2-$ ), 3.78 (3H, s,  $\text{OMe}$ ), 3.75 (3H, s,  $\text{OMe}$ ), 3.68 (1H, br-d,  $J_{3,4} = 2.5$  Hz, H-4), 3.62 (1H, dd,  $J_{1,2} = 8.0$  Hz,  $J_{2,3} = 10.0$  Hz, H-2), 3.52-3.41 (2H, m, H-5 or 5', - $\text{OCH}_2\text{CH}_2-$ ), 3.37 (1H, dd,  $J_{2,3} = 10.0$  Hz,  $J_{3,4} = 2.5$  Hz, H-3), 1.73-1.60 (2H, m, - $\text{OCH}_2\text{CH}_2-$ ), 1.48-1.23 (13H, m), 0.95 (3H, d,  $J = 6.5$  Hz, H-6 or 6'), 0.88 (3H, t,  $J = 7.0$  Hz, - $\text{OC}_7\text{H}_{14}\text{CH}_3$ );  $^{13}\text{C-NMR}$  (125 MHz,  $\text{CDCl}_3$ )  $\delta$  166.2, 159.0, 158.9, 138.7, 138.5, 132.9, 130.6, 130.5, 130.2, 129.8, 129.6, 129.1, 128.3 $\times 3$ ,

128.1×2, 127.5, 127.4, 113.6, 113.5, 104.0, 100.5, 79.8, 78.3, 78.0, 75.9, 74.9, 74.7, 73.2, 72.4, 71.8, 71.2, 70.7, 70.2, 65.5, 55.1×2, 31.8, 29.8, 29.4, 29.2, 26.1, 22.6, 16.6, 16.2, 14.1; HRMS (ESI-TOF)  $m/z$  969.4774 (969.4765 calcd. for  $C_{57}H_{70}O_{12}Na$ ,  $[M+Na]^+$ ).

### Compound 23

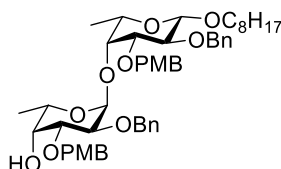

**23**

To a solution of **22** (1.26 g, 1.33 mmol) in MeOH/THF (1/1, v/v, 76 mL) was added 28% NaOMe in MeOH (7.92 mL, 39.9 mmol) at room temperature, and then the resultant mixture was stirred at 50 °C. After being stirred at the same temperature for 15 h, the reaction mixture was quenched with Amberlite® IR 120 H<sup>+</sup> form. The resultant suspension was filtered, and then the filtrate was concentrated in *vacuo*. The residue was subjected to silica gel column chromatography (6/1 PhMe/EtOAc) to give **23** (1.06 g, 1.26 mmol, 94% yield). Yellow syrup;  $R_f$  0.50 (6/1 PhMe/EtOAc);  $[\alpha]_D^{24}$   $-65.1^\circ$  ( $c$  1.0,  $CHCl_3$ );  $^1H$ -NMR (500 MHz,  $CDCl_3$ )  $\delta$  7.39-7.37 (2H, m, Ar-H), 7.34-7.24 (12H, m, Ar-H), 6.90-6.87 (2H, m, Ar-H), 6.82-6.79 (2H, m, Ar-H), 4.93-4.90 (2H, m, H-1', ArCH<sub>2</sub>), 4.81-4.76 (2H, m, ArCH<sub>2</sub>), 4.71-4.60 (5H, m, ArCH<sub>2</sub>), 4.32 (1H, br-q,  $J$  = 6.0 Hz, H-5 or 5'), 4.28 (1H, d,  $J_{1,2}$  = 7.5 Hz, H-1), 4.01 (1H, dd,  $J_{2,3}$  = 10.0 Hz,  $J_{3,4}$  = 3.0 Hz, H-3'), 3.97-3.92 (1H, m, -OCH<sub>2</sub>CH<sub>2</sub>-), 3.84-3.78 (8H, m, H-2', H-4', OMe×2), 3.64 (1H, br-d,  $J_{3,4}$  = 2.5 Hz, H-4), 3.59 (1H, dd,  $J_{1,2}$  = 8.0 Hz,  $J_{2,3}$  = 10.0 Hz, H-2), 3.51-3.46 (1H, m, -OCH<sub>2</sub>CH<sub>2</sub>-), 3.42 (1H, br-q,  $J$  = 6.0 Hz, H-5 or 5'), 3.35 (1H, dd,  $J_{2,3}$  = 10.0 Hz,  $J_{3,4}$  = 2.5 Hz, H-3), 2.40 (1H, br-s, OH-4'), 1.71-1.59 (2H, m, -OCH<sub>2</sub>CH<sub>2</sub>-), 1.44-1.23 (13H, m), 1.09 (3H, d,  $J$  = 7.0 Hz, H-6 or 6'), 0.87 (3H, t,  $J$  = 7.0 Hz, -OC<sub>7</sub>H<sub>14</sub>CH<sub>3</sub>);  $^{13}C$ -NMR (125 MHz,  $CDCl_3$ )  $\delta$  159.3, 159.0, 138.8, 138.5, 130.6, 130.4, 129.5, 129.1, 128.2, 128.1, 128.0, 127.4×2, 113.8, 113.6, 103.9, 100.1, 80.1, 78.5, 78.1, 77.5, 75.9, 74.7, 73.4, 72.2, 71.9, 70.7, 70.2×2, 65.8, 55.2×2, 31.8, 29.8, 29.4, 29.2, 26.1, 22.6, 16.7, 16.1, 14.1; HRMS (ESI-TOF)  $m/z$  865.4527 (865.4503 calcd. for  $C_{50}H_{66}O_{11}Na$ ,  $[M+Na]^+$ ).

## Compound 16

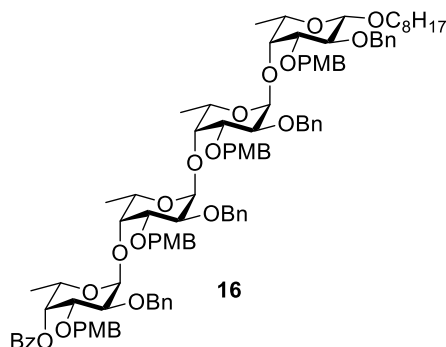

To a solution of **21** (26.9 mg, 27.5  $\mu\text{mol}$ ) and **23** (11.6 mg, 13.8  $\mu\text{mol}$ ) in  $\text{Et}_2\text{O}$  (0.81 mL) was added MS 5A (26.9 mg, 100 wt% to **21**) at room temperature. After being stirred at the same temperature for 1 h, the reaction mixture was cooled to  $-80\text{ }^\circ\text{C}$ , and then TMSOTf (2.13  $\mu\text{L}$ , 11.0  $\mu\text{mol}$ ) was added to the reaction mixture. After the reaction mixture was stirred for 5 h at the same temperature, the reaction was quenched with triethylamine (20  $\mu\text{L}$ ). The resultant mixture was filtered through Celite. And then, water was added to the filtrate. The aqueous layer was extracted with  $\text{EtOAc}$  (3 mL $\times$ 3), and then the combined extracts were washed with brine (3 mL), dried over anhydrous  $\text{Na}_2\text{SO}_4$ , and concentrated in *vacuo*. The residue was subjected to silica gel column chromatography (6/1 PhMe/ $\text{EtOAc}$ ) to give **16** (18.1 mg, 10.9  $\mu\text{mol}$ , 79% yield). White foam;  $R_f$  0.50 (10/1 PhMe/ $\text{EtOAc}$ );  $[\alpha]_D^{25} -72.5^\circ$  ( $c$  1.0,  $\text{CHCl}_3$ );  $^1\text{H-NMR}$  (500 MHz,  $\text{CDCl}_3$ )  $\delta$  8.00-7.98 (2H, m, Ar-H), 7.58-7.54 (1H, m, Ar-H), 7.44-7.40 (2H, m, Ar-H), 7.37-7.20 (28H, m, Ar-H), 6.88-6.77 (8H, m, Ar-H), 5.49 (1H, br-d,  $J_{3''',4'''} = 2.0$  Hz, H-4'''), 4.99 (1H, d,  $J = 3.0$  Hz, H-1' or 1'' or 1'''), 4.94 (1H, d,  $J = 3.5$  Hz, H-1' or 1'' or 1'''), 4.92-4.89 (1H, m, ArCH<sub>2</sub>), 4.82 (1H, d,  $J = 3.5$  Hz, H-1' or 1'' or 1'''), 4.80-4.59 (14H, m, ArCH<sub>2</sub>), 4.42-4.38 (2H, m, H-5 or 5' or 5'' or 5''', ArCH<sub>2</sub>), 4.28 (1H, d,  $J_{1,2} = 7.5$  Hz, H-1), 4.21 (2H, br-q,  $J = 6.5$  Hz, H-5 or 5' or 5'' or 5'''), 3.98-3.67 (22H, m, H-2', 2'', 2''', H-3', 3'', 3''', H-4, 4', 4'', OMe $\times$ 4, -OCH<sub>2</sub>CH<sub>2</sub>-), 3.56 (1H, dd,  $J_{1,2} = 7.5$  Hz,  $J_{2,3} = 10.0$  Hz, H-2), 3.52-3.46 (1H, m, -OCH<sub>2</sub>CH<sub>2</sub>-), 3.41 (1H, br-q,  $J = 6.0$  Hz, H-5 or 5' or 5'' or 5'''), 3.32 (1H, dd,  $J_{2,3} = 10.0$  Hz,  $J_{3,4} = 3.0$  Hz, H-3), 1.73-1.59 (2H, m, -OCH<sub>2</sub>CH<sub>2</sub>-), 1.45-1.20 (13H, m), 1.13-1.09 (6H, m, H-6 or 6' or 6'' or 6'''), 0.87 (3H, t,  $J = 7.0$  Hz, -OC<sub>7</sub>H<sub>14</sub>CH<sub>3</sub>), 0.81 (3H, d,  $J = 6.5$  Hz, H-6 or 6' or 6'' or 6''');  $^{13}\text{C-NMR}$  (125 MHz,  $\text{CDCl}_3$ )  $\delta$  166.3, 159.0, 158.9 $\times$ 2, 138.9, 138.7, 138.5 $\times$ 2, 132.9, 131.1 $\times$ 2, 130.7, 130.6, 130.2, 129.8, 129.4, 129.2, 129.0, 128.9, 128.6, 128.5, 128.3, 128.2, 128.1 $\times$ 2, 127.7, 127.5, 127.4 $\times$ 2, 113.6, 113.5, 103.9, 100.3, 99.7, 99.2, 79.8, 79.5, 78.6, 78.5, 76.6, 76.0, 75.6, 74.8, 74.6, 73.7, 72.9, 72.8, 72.5, 72.1 $\times$ 2, 71.8, 71.2, 70.7, 70.1, 67.6, 67.4, 65.4, 55.2 $\times$ 2, 31.8, 29.8, 29.5, 29.3, 26.2, 22.7, 16.8, 16.4, 16.3, 16.0, 14.1; HRMS (ESI-TOF)  $m/z$  1659.8180 (1659.8193 calcd. for C<sub>99</sub>H<sub>119</sub>O<sub>22</sub>, [M+H]<sup>+</sup>).



## Synthesis of tetrafucoside 11

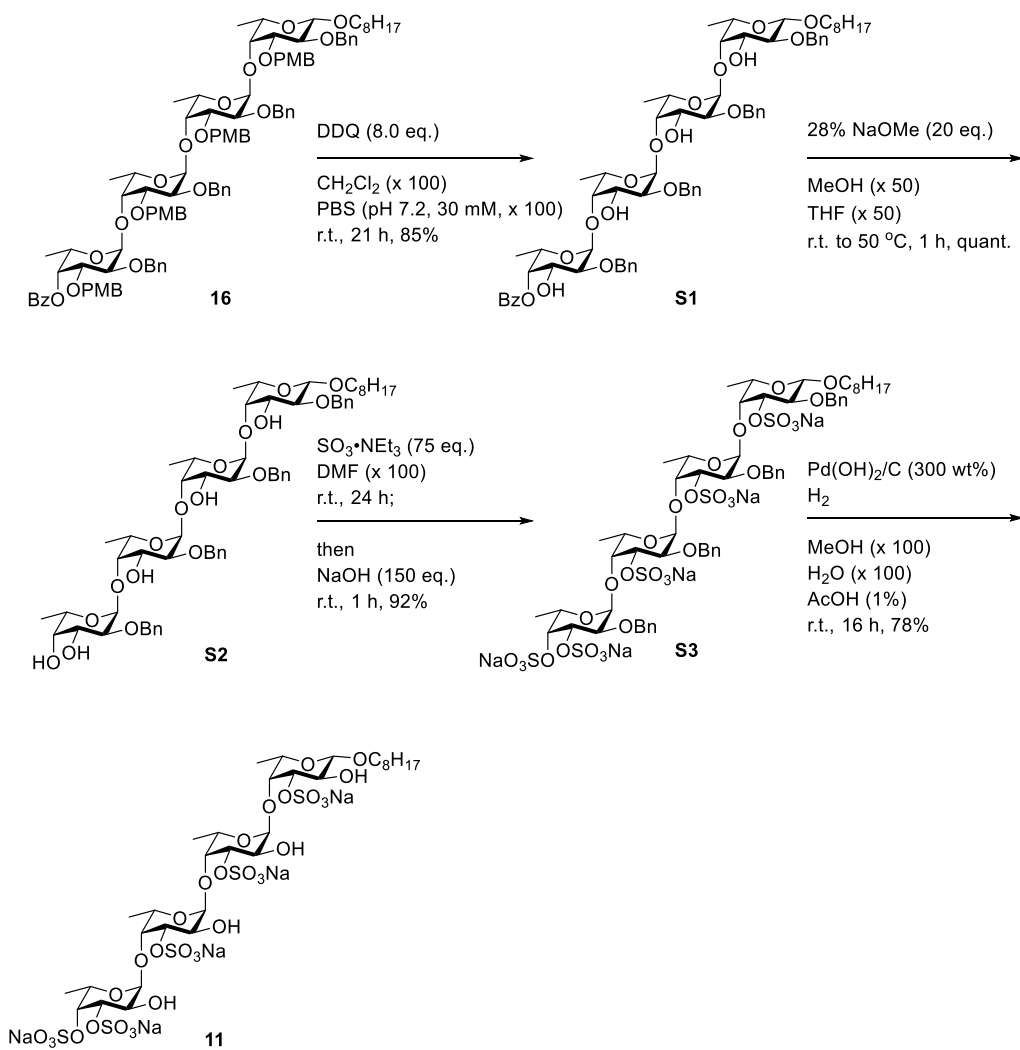

## Compound S1

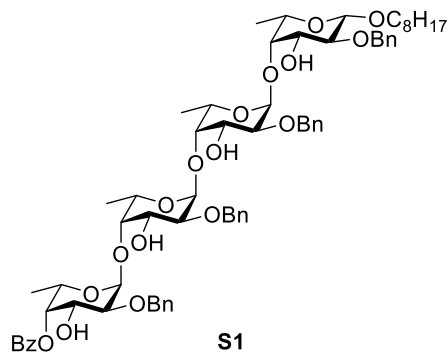

To a solution of **16** (29.5 mg, 17.8  $\mu\text{mol}$ ) in  $\text{CH}_2\text{Cl}_2/\text{PBS}$  (pH 7.2, 30 mM) (1/1, v/v, 6.0 mL) was added DDQ (32.3 mg, 142  $\mu\text{mol}$ ) at room temperature. After being stirred at the same temperature for 21 h, the reaction was quenched with saturated aq.  $\text{NaHCO}_3$  (6.0 mL). The aqueous layer was extracted with  $\text{CHCl}_3$  (10 mL $\times$ 3), and then the combined extracts were washed with brine (30 mL), dried over anhydrous  $\text{Na}_2\text{SO}_4$ , and concentrated in *vacuo*. The residue was subjected to silica gel column chromatography (2/1 PhMe/EtOAc) to give **S1** (17.9 mg, 15.1  $\mu\text{mol}$ , 85% yield). White solid;  $R_f$  0.50 (2/1 PhMe/EtOAc); m.p. 130-131  $^\circ\text{C}$ ;  $[\alpha]_D^{26} -196.5^\circ$  ( $c$  1.0,  $\text{CHCl}_3$ );  $^1\text{H-NMR}$  (500 MHz,  $\text{CDCl}_3$ )  $\delta$  8.03-8.00 (2H, m, Ar-H), 7.61-7.57 (1H, m, Ar-H), 7.47-7.44 (2H, m, Ar-H), 7.42-7.22 (20H, m, Ar-H), 5.40 (1H, br-d,  $J_{3''',4'''} = 3.5$  Hz, H-4'''), 5.00 (1H, d,  $J_{1''',2'''} = 3.5$  Hz, H-1'''), 4.97 (1H, d,  $J = 3.5$  Hz, H-1' or 1''), 4.95 (1H, d,  $J = 4.0$  Hz, H-1' or 1''), 4.89 and 4.78 (2H, ABq,  $J = 11.5$  Hz, ArCH<sub>2</sub>), 4.73-4.59 (6H, m), 4.31 (1H, d,  $J_{1,2} = 7.5$  Hz, H-1), 4.22-4.06 (5H, m, H-3, H-3''', H-5 or 5' or 5'' or 5''' $\times$ 3), 4.00-3.92 (2H, m, H-3' or 3'', -OCH<sub>2</sub>CH<sub>2</sub>-), 3.85 (1H, dd,  $J_{1''',2'''} = 3.5$  Hz,  $J_{2''',3'''} = 10.5$  Hz, H-2'''), 3.72-3.54 (8H, m, H-2', 2'', H-4, H-4' or 4'', H-5 or 5' or 5'' or 5''', OH $\times$ 3), 3.51-3.46 (1H, m, -OCH<sub>2</sub>CH<sub>2</sub>-), 3.26-3.21 (2H, m, H-2, H-3' or 3''), 2.94 (1H, d,  $J = 6.5$  Hz, H-4' or 4''), 2.18 (1H, d,  $J = 3.0$  Hz, OH), 1.71-1.59 (2H, m, -OCH<sub>2</sub>CH<sub>2</sub>-), 1.43-1.22 (16H, m), 1.17 (3H, d,  $J = 6.5$  Hz, H-6 or 6' or 6'' or 6'''), 1.07 (3H, d,  $J = 6.5$  Hz, H-6 or 6' or 6'' or 6'''), 0.88 (3H, t,  $J = 7.0$  Hz, -OC<sub>7</sub>H<sub>14</sub>CH<sub>3</sub>);  $^{13}\text{C-NMR}$  (125 MHz,  $\text{CDCl}_3$ )  $\delta$  166.5, 138.6, 138.1, 137.7, 137.4, 133.2, 129.8, 129.7, 128.6 $\times$ 2, 128.4, 128.2 $\times$ 2, 128.1 $\times$ 2, 127.8 $\times$ 2, 127.5, 104.0, 100.0, 99.8, 99.7, 83.5, 83.4, 82.6, 79.5, 76.5 $\times$ 2, 75.9, 74.4, 73.9, 73.7, 73.2, 72.8, 72.7, 70.5, 70.3, 69.0, 68.9, 67.9 $\times$ 2, 67.7, 66.2, 31.8, 29.7, 29.4, 29.2, 26.1, 22.6, 16.6, 16.4, 16.2 $\times$ 2, 14.1; HRMS (ESI-TOF)  $m/z$  1179.5872 (1179.5892 calcd. for C<sub>67</sub>H<sub>87</sub>O<sub>18</sub>, [M+H]<sup>+</sup>).

## Compound S2

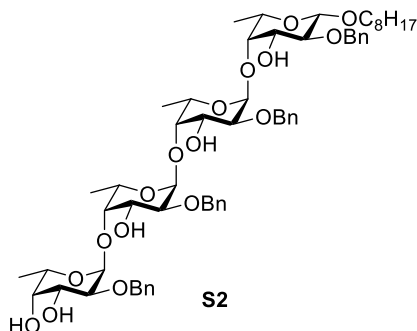

To a solution of **S1** (233 mg, 198  $\mu\text{mol}$ ) in MeOH/THF (1/1, v/v, 23 mL) was added 28% NaOMe in MeOH (787  $\mu\text{L}$ , 3.96 mmol) at room temperature, and then the resultant mixture was stirred at 50  $^{\circ}\text{C}$ . After being stirred at the same temperature for 1 h, the reaction was quenched with Amberlite<sup>®</sup> IR 120 H<sup>+</sup> form. The resultant suspension was filtered, and then the filtrate was concentrated in *vacuo*. The residue was subjected to silica gel column chromatography (10/1 CHCl<sub>3</sub>/MeOH) to give **S2** (212.8 mg, 198  $\mu\text{mol}$ , quant.). White solid;  $R_f$  0.60 (7/1 CHCl<sub>3</sub>/MeOH); m.p. 173-174  $^{\circ}\text{C}$ ;  $[\alpha]_D^{27} -122.3^{\circ}$  ( $c$  1.0, CHCl<sub>3</sub>); <sup>1</sup>H-NMR (500 MHz, CD<sub>3</sub>OD)  $\delta$  7.42-7.37 (8H, m, Ar-H), 7.35-7.22 (12H, m, Ar-H), 4.98 (1H, d,  $J = 3.5$  Hz, H-1' or 1'' or 1'''), 4.95 (1H, d,  $J = 3.5$  Hz, H-1' or 1'' or 1'''), 4.90 (1H, d,  $J = 4.0$  Hz, H-1' or 1'' or 1'''), 4.86-4.66 (8H, m, ArCH<sub>2</sub>), 4.34 (1H, d,  $J_{1,2} = 7.0$  Hz, H-1), 4.22-4.17 (3H, m, H-5 or 5' or 5'' or 5''' $\times$ 3), 4.03 (1H, dd,  $J = 10.5$  Hz,  $J = 3.0$  Hz, H-3' or 3'' or 3'''), 3.93-3.86 (3H, m, H-3' or 3'' or 3''' $\times$ 2, -OCH<sub>2</sub>CH<sub>2</sub>-), 3.76-3.63 (8H, m, H-2', 2'', 2''', H-4, 4', 4'', 4''', H-5 or 5' or 5'' or 5'''), 3.57 (1H, dd,  $J_{2,3} = 9.5$  Hz,  $J_{3,4} = 3.5$  Hz, H-3), 3.53-3.48 (1H, m, -OCH<sub>2</sub>CH<sub>2</sub>-), 3.28 (1H, dd,  $J_{1,2} = 7.5$  Hz,  $J_{2,3} = 10.0$  Hz, H-2), 1.63-1.59 (2H, m, -OCH<sub>2</sub>CH<sub>2</sub>-), 1.45-1.22 (13H, m), 1.16 (9H, d,  $J = 6.5$  Hz, H-6 or 6' or 6'' or 6''' $\times$ 3), 0.88 (3H, t,  $J = 7.0$  Hz, -OC<sub>7</sub>H<sub>14</sub>CH<sub>3</sub>); <sup>13</sup>C-NMR (125 MHz, CD<sub>3</sub>OD)  $\delta$  140.1, 140.0, 139.8, 139.7, 129.5, 129.4, 129.3 $\times$ 3, 129.2 $\times$ 2, 128.8, 128.7 $\times$ 2, 128.6, 105.1, 101.3, 101.1, 101.0, 84.1, 83.8, 83.5, 80.4, 78.0, 77.8, 77.5, 75.4, 74.4, 74.0, 73.9, 73.7, 72.0, 70.9, 70.6, 70.3, 70.0, 69.2, 69.1, 68.5, 33.0, 30.9, 30.5, 30.4, 27.4, 23.7, 17.1, 17.0 $\times$ 2, 16.7, 14.4; HRMS (ESI-TOF)  $m/z$  1075.5580 (1075.5630 calcd. for C<sub>60</sub>H<sub>83</sub>O<sub>17</sub>, [M+H]<sup>+</sup>).

### Compound S3

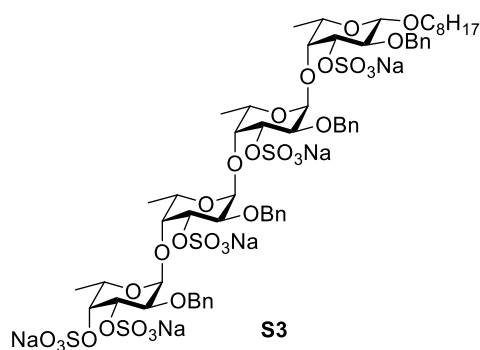

To a solution of **S2** (5.2 mg, 4.84  $\mu\text{mol}$ ) in DMF (0.52 mL) was added  $\text{SO}_3 \cdot \text{NEt}_3$  (65.7 mg, 363  $\mu\text{mol}$ ) at room temperature. After being stirred at the same temperature for 24 h, 3 M NaOH aq. (240  $\mu\text{L}$ , 725  $\mu\text{mol}$ ) was added to the reaction mixture and the mixture was stirred for 1 h. And then, the resultant mixture was subjected to reverse phase silica gel column chromatography (100/0 to 0/100  $\text{H}_2\text{O}/\text{MeOH}$ ) and gel filtration chromatography to give **S3** (7.1 mg, 4.45  $\mu\text{mol}$ , 92% yield). White solid;  $R_f$  0.60 (10/10/1  $\text{CHCl}_3/\text{MeOH}/\text{H}_2\text{O}$ ); m.p.  $>300^\circ\text{C}$ ;  $[\alpha]_D^{31} -99.6^\circ$  ( $c$  1.0,  $\text{H}_2\text{O}$ );  $^1\text{H-NMR}$  (500 MHz,  $\text{D}_2\text{O}$ )  $\delta$  7.51-7.31 (20H, m, Ar-H), 5.09 (1H, d,  $J = 4.0$  Hz, H-1' or 1'' or 1'''), 5.05 (1H, d,  $J = 4.0$  Hz, H-1' or 1'' or 1'''), 4.95 (1H, d,  $J = 4.0$  Hz, H-1' or 1'' or 1'''), 4.86-4.51 (12H, m, H-1, H-3' or 3'', H-3''', H-4''', Ar $\text{CH}_2$ ), 4.45 (1H, dd,  $J = 3.0$  Hz,  $J = 11.0$  Hz, H-3' or 3''), 4.33 (1H, dd,  $J_{2,3} = 10.5$  Hz,  $J_{3,4} = 3.0$  Hz, H-3), 4.07 (1H, br-d,  $J_{3,4} = 3.0$  Hz, H-4), 4.04-3.99 (2H, m, H-4' or 4'', H-5 or 5' or 5'' or 5'''), 3.96-3.61 (10H, m, H-2, 2', 2'', 2''', H-4' or 4'', H-5 or 5' or 5'' or 5''') $\times 3$ , - $\text{OCH}_2\text{CH}_2$ -), 1.67-1.60 (2H, m, - $\text{OCH}_2\text{CH}_2$ -), 1.44-1.37 (16H, m), 1.22 (3H, d,  $J = 6.5$  Hz, H-6 or 6' or 6'' or 6'''), 1.15 (3H, d,  $J = 6.5$  Hz, H-6 or 6' or 6'' or 6'''), 0.86 (3H, t,  $J = 7.0$  Hz, - $\text{OC}_7\text{H}_{14}\text{CH}_3$ );  $^{13}\text{C-NMR}$  (125 MHz,  $\text{D}_2\text{O}$ )  $\delta$  138.2, 137.8, 137.6 $\times 2$ , 130.6 $\times 2$ , 130.1, 129.8, 129.3, 129.2, 128.9 $\times 2$ , 103.3, 99.8, 99.6, 99.3, 80.5, 80.4, 79.9, 79.3, 78.5, 76.0, 75.7, 75.4, 75.3, 75.0, 74.6, 73.8, 73.5, 72.8, 72.3, 71.6, 71.4, 68.6, 68.5, 67.1, 31.8, 29.6, 29.2, 26.0, 22.7, 16.5, 16.0 $\times 2$ , 15.8, 14.1; HRMS (ESI-TOF)  $m/z$  1585.2616 (1585.2568 calcd. for  $\text{C}_{60}\text{H}_{78}\text{O}_{32}\text{S}_5\text{Na}_5$ ,  $[\text{M}+\text{H}]^+$ ).

## Compound 11

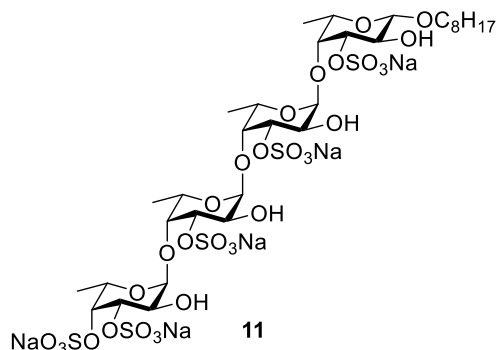

To a solution of **S3** (7.7 mg, 4.86  $\mu\text{mol}$ ) in MeOH/H<sub>2</sub>O (1/1, v/v, 1.4 mL) were added AcOH (14  $\mu\text{L}$ , 2% to MeOH) and Pd(OH)<sub>2</sub>/C (23.0 mg, 300wt% to **S3**) under H<sub>2</sub> atmosphere at room temperature. After being stirred for 16 h, the reaction mixture was filtered through Celite, and then the filtrate was concentrated in *vacuo*. The residue was subjected to reverse phase silica gel column chromatography (100/0 to 0/100 H<sub>2</sub>O/MeOH) and gel filtration chromatography to give **11** (4.6 mg, 3.79  $\mu\text{mol}$ , 78% yield). White solid; *R<sub>f</sub>* 0.40 (10/10/1 CHCl<sub>3</sub>/MeOH/H<sub>2</sub>O); m.p. >300 °C;  $[\alpha]_{\text{D}}^{28} -131.7^\circ$  (*c* 1.0, H<sub>2</sub>O); <sup>1</sup>H-NMR (500 MHz, D<sub>2</sub>O)  $\delta$  5.16 (1H, d, *J* = 3.5 Hz, H-1' or 1'' or 1'''), 5.12 (2H, m, H-1' or 1'' or 1''' $\times$ 2), 4.92 (1H, br-d, *J* = 2.0 Hz, H-4' or 4'' or 4'''), 4.69-4.61 (4H, m, H-3', 3'', 3''', H-5 or H-5' or H-5'' or H-5'''), 4.58-4.51 (3H, m, H-1, H-5 or 5' or 5'' or 5''' $\times$ 2), 4.35 (1H, dd, *J*<sub>2,3</sub> = 10.0 Hz, *J*<sub>3,4</sub> = 3.0 Hz, H-3), 4.27 (1H, br-d, *J* = 2.0 Hz, H-4' or H-4'' or H-4'''), 4.25 (1H, br-d, *J* = 2.0 Hz, H-4' or H-4'' or H-4'''), 4.19 (1H, br-d, *J*<sub>3,4</sub> = 2.5 Hz, H-4), 4.16-4.10 (2H, m, H-2' or 2'' or 2''' $\times$ 2), 4.01 (1H, dd, *J* = 10.5 Hz, *J* = 3.5 Hz, H-2' or 2'' or 2'''), 3.93-3.87 (2H, m, H-5 or 5' or 5'' or 5''', -OCH<sub>2</sub>CH<sub>2</sub>-), 3.76-3.66 (2H, m, H-2, -OCH<sub>2</sub>CH<sub>2</sub>-), 1.66-1.60 (2H, m, -OCH<sub>2</sub>CH<sub>2</sub>-), 1.43-1.27 (22H, m), 0.87 (3H, t, *J* = 7.0 Hz, -OC<sub>7</sub>H<sub>14</sub>CH<sub>3</sub>); <sup>13</sup>C-NMR (125 MHz, D<sub>2</sub>O)  $\delta$  102.7, 100.6, 100.3, 100.1, 79.9, 79.7, 78.2, 78.0, 77.0, 76.6, 76.5, 75.4, 71.3, 71.2, 69.2, 68.5, 68.4, 67.2 $\times$ 2, 67.1, 31.5, 29.2, 28.8, 28.7, 25.4, 22.4, 16.4, 15.9, 13.8; HRMS (ESI-TOF) *m/z* 1225.0746 (1225.0690 calcd. for C<sub>32</sub>H<sub>54</sub>O<sub>32</sub>S<sub>5</sub>Na<sub>5</sub>, [M+H]<sup>+</sup>).

## Synthesis of tetrafucoside 12

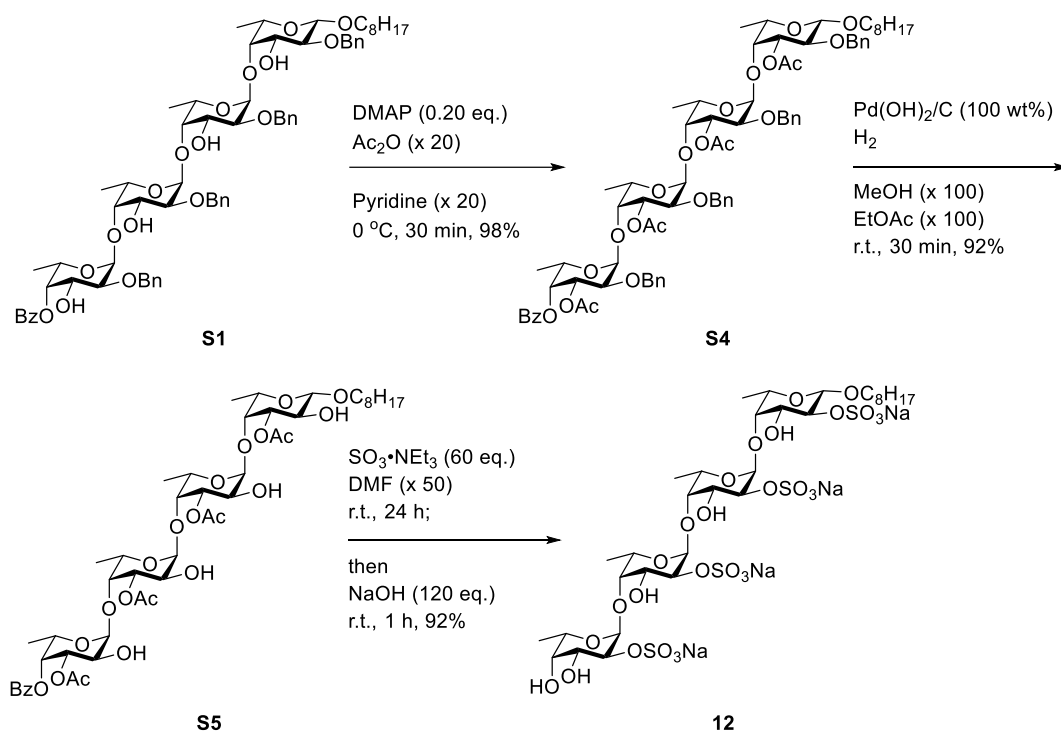

## Compound S4

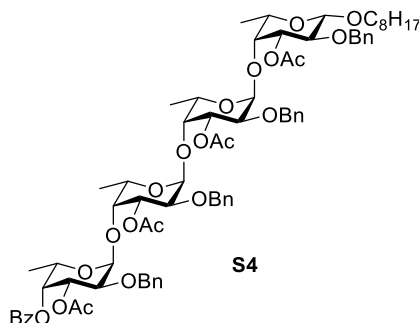

To a solution of **S1** (18.2 mg, 15.4  $\mu\text{mol}$ ) in pyridine (0.3 mL) was added DMAP (0.376 mg, 3.08  $\mu\text{mol}$ ) at 0 °C. And then,  $\text{Ac}_2\text{O}$  (0.3 mL) was dropwisely added to the reaction mixture at the same temperature. After being stirred at room temperature for 0.5 h, the reaction was quenched with 1 M HCl aq. (0.5 mL) at 0 °C. The aqueous layer was extracted with EtOAc (5 mL $\times$ 3), and then the combined extracts were washed with brine (15 mL), dried over anhydrous  $\text{Na}_2\text{SO}_4$ , and concentrated in *vacuo*. The residue was subjected to silica gel column chromatography (6/1 PhMe/EtOAc) to give **S4** (20.4 mg, 15.1  $\mu\text{mol}$ , 98% yield). White solid;  $R_f$  0.50 (6/1 PhMe/EtOAc); m.p. 135-136 °C;  $[\alpha]_D^{26} -150.5^\circ$  ( $c$  1.0,  $\text{CHCl}_3$ );  $^1\text{H-NMR}$  (500 MHz,  $\text{CDCl}_3$ )  $\delta$  8.03-8.00 (2H, m, Ar-H), 7.64-7.60 (1H, m, Ar-H), 7.50-7.46 (2H, m, Ar-H), 7.35-7.22 (20H, m, Ar-H), 5.51 (1H, br-d,  $J_{3''',4'''} = 3.0$  Hz, H-4'''), 5.42 (1H, dd,  $J_{2''',3'''} = 10.5$  Hz,  $J_{3''',4'''} = 3.5$  Hz, H-3'''), 5.27-5.21 (2H, m, H-3', 3''), 4.89 (1H, d,  $J_{1''',2'''} = 3.5$  Hz, H-1'''), 4.87-4.83 (3H, m, ArCH<sub>2</sub>, H-1', 1''), 4.80 (1H, dd,  $J_{2,3} = 10.5$  Hz,  $J_{3,4} = 3.0$  Hz, H-3), 4.68-4.55 (7H, m, ArCH<sub>2</sub>), 4.37 (1H, d,  $J_{1,2} = 7.5$  Hz, H-1), 4.25-4.12 (3H, m, H-5 or 5' or 5'' $\times$ 2, H-5'''), 4.00-3.90 (6H, m, H-2', 2'', 2''', H-4', 4'', -OCH<sub>2</sub>CH<sub>2</sub>-), 3.82 (1H, br-d,  $J_{3,4} = 3.0$  Hz, H-4), 3.63-3.57 (2H, m, H-2, H-5 or 5' or 5''), 3.51-3.46 (1H, m, -OCH<sub>2</sub>CH<sub>2</sub>-), 2.03 (3H, s, OAc), 2.02 (3H, s, OAc), 1.99 (3H, s, OAc), 1.94 (3H, s, OAc), 1.70-1.58 (2H, m, -OCH<sub>2</sub>CH<sub>2</sub>-), 1.43-1.22 (16H, m), 1.17 (3H, d,  $J = 6.5$  Hz, H-6 or 6' or 6'' or 6'''), 1.06 (3H, d,  $J = 6.5$  Hz, H-6 or 6' or 6'' or 6'''), 0.87 (3H, t,  $J = 7.0$  Hz, -OC<sub>7</sub>H<sub>14</sub>CH<sub>3</sub>);  $^{13}\text{C-NMR}$  (125 MHz,  $\text{CDCl}_3$ )  $\delta$  171.0, 170.7, 170.2, 166.0, 138.6, 138.2, 137.8, 137.7, 133.3, 129.8, 128.5 $\times$ 2, 128.4 $\times$ 2, 128.3, 128.2 $\times$ 2, 128.0, 127.9, 127.6, 127.5, 103.8, 100.4, 100.0, 99.7, 80.1, 79.5, 78.7, 76.2, 74.6, 74.5, 74.2, 73.6, 73.5, 73.3, 73.0, 72.2, 72.1, 71.9, 70.6, 70.4, 70.1, 66.9, 65.2, 31.8, 29.7, 29.4, 29.3, 26.1, 22.7, 21.5 $\times$ 2, 21.3, 20.9, 16.7, 16.6, 16.3, 14.1; HRMS (ESI-TOF)  $m/z$  1347.6273 (1347.6315 calcd. for C<sub>75</sub>H<sub>95</sub>O<sub>22</sub>, [M+H]<sup>+</sup>).

## Compound S5

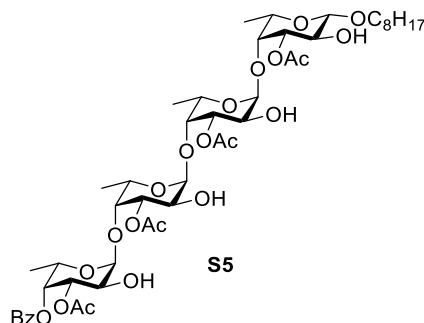

To a solution of **S4** (14.3 mg, 10.6  $\mu\text{mol}$ ) in MeOH/EtOAc (1/1, v/v, 2.8 mL) was added Pd(OH)<sub>2</sub>/C (14.3 mg, 100 wt% to **S4**) under H<sub>2</sub> atmosphere at room temperature. After being stirred for 0.5 h, the reaction mixture was filtered through Celite, and then the filtrate was concentrated in *vacuo*. The residue was subjected to silica gel column chromatography (10/1 CHCl<sub>3</sub>/MeOH) to give **S5** (9.7 mg, 9.8  $\mu\text{mol}$ , 92% yield). White solid;  $R_f$  0.60 (10/1 CHCl<sub>3</sub>/MeOH); m.p. 127-128 °C;  $[\alpha]_D^{24} -193.1^\circ$  ( $c$  1.0, CHCl<sub>3</sub>); <sup>1</sup>H-NMR (500 MHz, CD<sub>3</sub>OD)  $\delta$  8.08-8.06 (2H, m, Ar-H), 7.67-7.63 (1H, m, Ar-H), 7.54-7.51 (2H, m, Ar-H), 5.54 (1H, br-d,  $J_{3''',4'''} = 1.5$  Hz, H-4'''), 5.29-5.21 (3H, m, H-3', 3'', 3'''), 5.07 (1H, d,  $J = 3.5$  Hz, H-1' or 1'' or 1'''), 5.02 (1H, d,  $J = 3.5$  Hz, H-1' or 1'' or 1'''), 4.99 (1H, d,  $J = 3.5$  Hz, H-1' or 1'' or 1'''), 4.90 (1H, dd,  $J_{2,3} = 10.5$  Hz,  $J_{3,4} = 3.0$  Hz, H-3), 4.67 (1H, q,  $J = 7.0$  Hz, H-5 or 5' or 5'' or 5'''), 4.49-4.42 (2H, m, H-5 or 5' or 5'' or 5''') $\times$ 2, 4.36 (1H, d,  $J_{1,2} = 7.5$  Hz, H-1), 4.15-4.02 (5H, m, H-2', 2'', 2''', H-4', 4''), 3.98-3.97 (1H, m, H-4), 3.90-3.86 (1H, m, -OCH<sub>2</sub>CH<sub>2</sub>-), 3.81 (1H, q,  $J = 6.5$  Hz, H-5 or 5' or 5'' or 5'''), 3.66 (1H, dd,  $J_{1,2} = 7.5$  Hz,  $J_{2,3} = 10.0$  Hz, H-2), 3.61-3.56 (1H, m, -OCH<sub>2</sub>CH<sub>2</sub>-), 2.17 (3H, s, OAc), 2.17 (3H, s, OAc), 2.15 (3H, s, OAc), 1.95 (3H, s, OAc), 1.68-1.62 (2H, m, -OCH<sub>2</sub>CH<sub>2</sub>-), 1.42-1.27 (19H, m), 1.18 (3H, d,  $J = 6.5$  Hz, H-6 or 6' or 6'' or 6'''), 0.90 (3H, t,  $J = 7.0$  Hz, -OC<sub>7</sub>H<sub>14</sub>CH<sub>3</sub>); <sup>13</sup>C-NMR (125 MHz, CD<sub>3</sub>OD)  $\delta$  172.7, 172.6, 172.4, 172.3, 167.6, 134.7, 130.9, 130.7, 129.8, 104.9, 102.4, 102.2, 102.0, 79.4, 78.6, 77.6, 76.1, 73.6, 73.4, 72.3, 72.2, 71.6, 70.2, 68.7 $\times$ 2, 68.4, 68.2, 68.1, 66.4, 33.0, 30.9, 30.6, 30.4, 27.1, 23.7, 21.5 $\times$ 2, 21.4, 20.8, 17.5, 17.4, 16.9, 14.4; HRMS (ESI-TOF)  $m/z$  987.4412 (987.4437 calcd. for C<sub>47</sub>H<sub>71</sub>O<sub>22</sub> [M+H]<sup>+</sup>).



## Compound 12

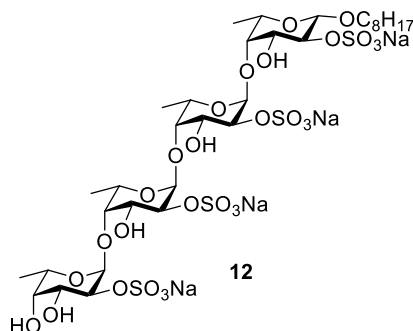

To a solution of **S5** (9.4 mg, 9.52  $\mu\text{mol}$ ) in DMF (0.5 mL) was added  $\text{SO}_3 \cdot \text{NEt}_3$  (104 mg, 571  $\mu\text{mol}$ ) at room temperature. After being stirred at the same temperature for 24 h, 3 M NaOH aq. (46  $\mu\text{L}$ , 1.14 mmol) was added to the reaction mixture and the mixture was stirred for 1 h. And then, the resultant mixture was subjected to reverse phase silica gel column chromatography (100/0 to 0/100  $\text{H}_2\text{O}/\text{MeOH}$ ) and gel filtration chromatography to give **12** (9.8 mg, 8.76  $\mu\text{mol}$ , 92% yield). White solid;  $R_f$  0.40 (10/10/1  $\text{CHCl}_3/\text{MeOH}/\text{H}_2\text{O}$ ); m.p.  $>300$   $^\circ\text{C}$ ;  $[\alpha]_D^{25} -127.2^\circ$  ( $c$  0.79,  $\text{H}_2\text{O}$ );  $^1\text{H-NMR}$  (500 MHz,  $\text{D}_2\text{O}$ )  $\delta$  5.26-5.24 (3H, m, H-1', 1'', 1'''), 4.57-4.42 (7H, m, H-1, H-2', 2'', 2''', H-5 or 5' or 5'' or 5''' $\times 3$ ), 4.23-4.18 (3H, m, H-2, H-3' or 3'' or 3''' $\times 2$ ), 4.15 (1H, dd,  $J = 10.5$  Hz, 3.5 Hz, H-3' or 3'' or 3'''), 4.01-3.98 (2H, m, H-4' or 4'' or 4''' $\times 2$ ), 3.94 (1H, br-d,  $J = 3.0$  Hz, H-4' or 4'' or 4'''), 3.88-3.83 (4H, m, H-3, H-4, H-5 or 5' or 5'' or 5''',  $-\text{OCH}_2\text{CH}_2-$ ), 3.68-3.61 (1H, m,  $-\text{OCH}_2\text{CH}_2-$ ), 1.64-1.58 (2H, m,  $-\text{OCH}_2\text{CH}_2-$ ), 1.41-1.26 (19H, m), 1.22 (3H, d,  $J = 6.5$  Hz, H-6 or 6' or 6'' or 6'''), 0.86 (3H, t,  $J = 7.0$  Hz,  $-\text{OC}_7\text{H}_{14}\text{CH}_3$ );  $^{13}\text{C-NMR}$  (125 MHz,  $\text{D}_2\text{O}$ )  $\delta$  101.0, 99.7 $\times 2$ , 99.4, 83.4, 83.0, 81.6, 79.2, 76.0, 75.9, 72.5, 72.4, 71.3, 71.0, 68.9, 68.8, 68.6, 68.0, 67.6, 67.5, 67.4, 31.5, 29.1, 28.8 $\times 2$ , 25.3, 22.4, 15.9, 15.8 $\times 2$ , 15.6, 13.8; HRMS (ESI-TOF)  $m/z$  1145.1085 (1145.1122 calcd. for  $\text{C}_{32}\text{H}_{54}\text{O}_{29}\text{S}_4\text{Na}_5$ ,  $[\text{M}+\text{Na}]^+$ ).

## Synthesis of tetrafucosides 13 and 10

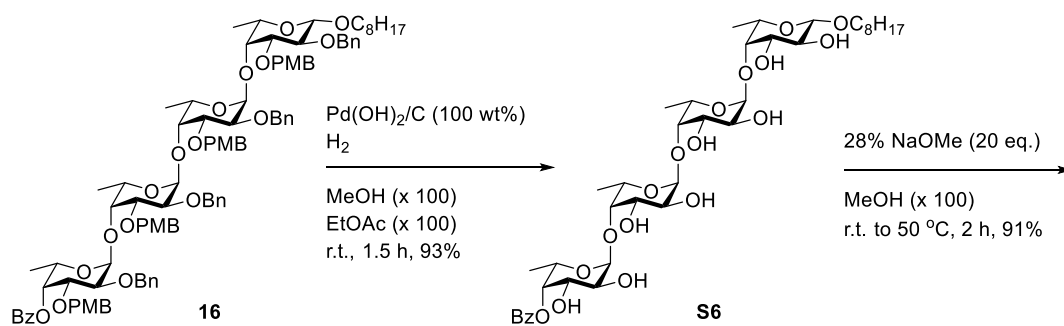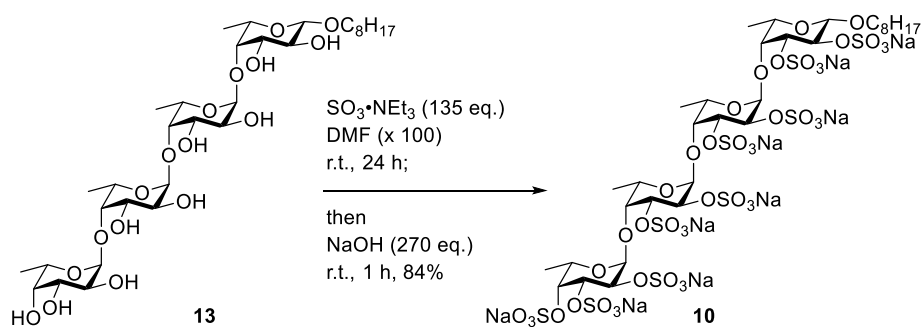

## Compound S6

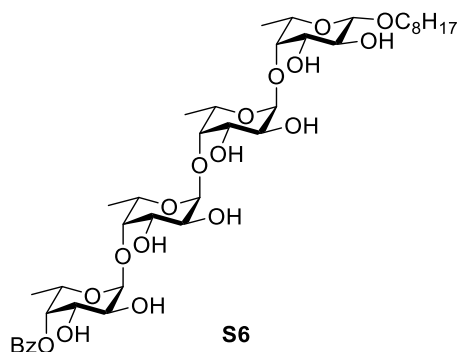

To a solution of **16** (31.0 mg, 18.7  $\mu\text{mol}$ ) in MeOH/EtOAc (1/1, v/v, 6.2 mL) was added Pd(OH)<sub>2</sub>/C (31.0 mg, 100 wt% to **16**) under H<sub>2</sub> atmosphere at room temperature. After being stirred for 1.5 h, the reaction mixture was filtered through Celite, and then the filtrate was concentrated in *vacuo*. The residue was subjected to silica gel column chromatography (6/1 CHCl<sub>3</sub>/MeOH) to give **S6** (14.2 mg, 17.3  $\mu\text{mol}$ , 93% yield). White solid; *R<sub>f</sub>* 0.60 (6/1 CHCl<sub>3</sub>/MeOH); m.p. 189-190 °C;  $[\alpha]_D^{25} -96.7^\circ$  (*c* 1.0, CHCl<sub>3</sub>); <sup>1</sup>H-NMR (500 MHz, CD<sub>3</sub>OD)  $\delta$  8.08-8.06 (2H, m, Ar-H), 7.64-7.60 (1H, m, Ar-H), 7.51-7.47 (2H, m, Ar-H), 5.43 (1H, br-d,  $J_{3''',4'''} = 3.0$  Hz, H-4'''), 4.99 (1H, d,  $J_{1''',2'''} = 4.0$  Hz, H-1'''), 4.92 (1H, d,  $J = 4.0$  Hz, H-1' or 1''), 4.88-4.81 (2H, m, H-1' or 1'', H-5 or 5' or 5'' or 5'''), 4.65-4.58 (2H, m, H-5 or 5' or 5'' or 5''') $\times 2$ , 4.26 (1H, d,  $J_{1,2} = 7.5$  Hz, H-1), 4.10 (1H, dd,  $J_{2''',3'''} = 11.0$  Hz,  $J_{3''',4'''} = 3.0$  Hz, H-3'''), 3.95-3.79 (7H, m, H-2' or 2'' or 2''') $\times 2$ , H-3', 3'', H-4', 4'', -OCH<sub>2</sub>CH<sub>2</sub>-), 3.74-3.70 (3H, m, H-2' or 2'' or 2''', H-4, H-5 or 5' or 5'' or 5'''), 3.60-3.54 (2H, m, H-3, -OCH<sub>2</sub>CH<sub>2</sub>-), 3.42 (1H, dd,  $J_{1,2} = 7.5$  Hz,  $J_{2,3} = 10.0$  Hz, H-2), 1.68-1.62 (2H, m, -OCH<sub>2</sub>CH<sub>2</sub>-), 1.45-1.27 (19H, m), 1.09 (3H, d,  $J = 6.0$  Hz, H-6 or 6' or 6'' or 6'''), 0.91 (3H, t,  $J = 6.5$  Hz, -OC<sub>7</sub>H<sub>14</sub>CH<sub>3</sub>); <sup>13</sup>C-NMR (125 MHz, CD<sub>3</sub>OD)  $\delta$  168.0, 134.2, 131.5, 130.7, 129.5, 105.1, 102.7, 102.5 $\times 2$ , 82.1, 81.9, 80.8, 76.4, 74.4, 72.5, 72.3, 71.4, 71.2, 71.0 $\times 2$ , 70.9, 70.8, 69.9, 68.9, 68.8, 67.0, 33.0, 30.9, 30.6, 30.4, 27.1, 23.7, 16.7 $\times 2$ , 16.6, 14.4; HRMS (ESI-TOF) *m/z* 819.3989 (819.4014 calcd. for C<sub>39</sub>H<sub>63</sub>O<sub>18</sub>, [M+H]<sup>+</sup>).

## Compound 13

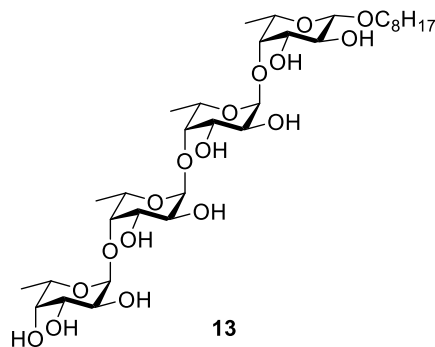

To a solution of **S6** (14.2 mg, 17.3  $\mu\text{mol}$ ) in MeOH (1.4 mL) was added 28% NaOMe in MeOH (380  $\mu\text{L}$ , 34.6  $\mu\text{mol}$ ) at room temperature, and then the resultant mixture was stirred at 50  $^{\circ}\text{C}$ . After being stirred at the same temperature for 2 h, the reaction was quenched with Amberlite<sup>®</sup> IR 120  $\text{H}^+$  form. The resultant suspension was filtered, and then the filtrate was concentrated in *vacuo*. The residue was subjected to silica gel column chromatography (4/1  $\text{CHCl}_3/\text{MeOH}$ ) to give **13** (11.2 mg, 15.7  $\mu\text{mol}$ , 91% yield). White solid;  $R_f$  0.40 (4/1  $\text{CHCl}_3/\text{MeOH}$ ); m.p. 142-143  $^{\circ}\text{C}$ ;  $[\alpha]_D^{29} -77.9^{\circ}$  ( $c$  0.53, MeOH);  $^1\text{H-NMR}$  (500 MHz,  $\text{D}_2\text{O}$ )  $\delta$  4.99-4.97 (2H, m, H-1' or 1'' or 1''' $\times$ 2), 4.95 (1H, d,  $J = 3.5$  Hz, H-1' or 1'' or 1'''), 4.58-4.50 (3H, m, H-5 or 5' or 5'' or 5''' $\times$ 3), 4.40 (1H, d,  $J_{1,2} = 8.0$  Hz, H-1), 4.03-4.00 (2H, m, H-3' or 3'' or 3''' $\times$ 2), 3.92 (1H, dd,  $J = 3.0$  Hz, 10.5 Hz, H-3' or 3'' or 3'''), 3.88-3.77 (9H, m, H-2', 2'', 2''', H-4, 4', 4'', 4''', H-5 or 5' or 5'' or 5''',  $-\text{OCH}_2\text{CH}_2-$ ), 3.71 (1H, dd,  $J_{2,3} = 10.0$  Hz,  $J_{3,4} = 3.0$  Hz, H-3), 3.68-3.63 (1H, m,  $-\text{OCH}_2\text{CH}_2-$ ), 3.47 (1H, dd,  $J_{1,2} = 8.0$  Hz,  $J_{2,3} = 10.0$  Hz, H-2), 1.64-1.58 (2H, m,  $-\text{OCH}_2\text{CH}_2-$ ), 1.37-1.24 (19H, m), 1.17 (3H, d,  $J = 6.5$  Hz, H-6 or 6' or 6'' or 6'''), 0.86 (3H, t,  $J = 7.0$  Hz,  $-\text{OC}_7\text{H}_{14}\text{CH}_3$ );  $^{13}\text{C-NMR}$  (125 MHz,  $\text{D}_2\text{O}$ , acetone- $d_6$ )  $\delta$  103.1, 100.9, 100.8, 100.7, 80.6, 80.5, 79.6, 72.7, 72.3, 71.1, 70.9, 69.7, 69.2 $\times$ 2, 69.1 $\times$ 2, 69.0, 67.9, 67.8, 67.2, 31.5, 29.3, 28.9, 28.8, 25.5, 22.4, 15.8, 15.6, 15.5, 13.8; HRMS (ESI-TOF)  $m/z$  737.3563 (737.3572 calcd. for  $\text{C}_{32}\text{H}_{58}\text{O}_{17}\text{Na}$ ,  $[\text{M}+\text{Na}]^+$ ).

## Compound 10

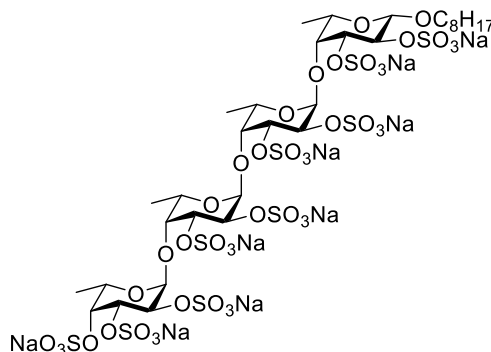

**10**

To a solution of **13** (2.4 mg, 3.36  $\mu\text{mol}$ ) in DMF (0.24 mL) was added  $\text{SO}_3 \cdot \text{NEt}_3$  (82.2 mg, 453  $\mu\text{mol}$ ) at room temperature. After being stirred at the same temperature for 24 h, 3 M NaOH aq. (302  $\mu\text{L}$ , 907  $\mu\text{mol}$ ) was added to the reaction mixture and the mixture was stirred for 1 h. And then, the resultant mixture was subjected to reverse phase silica gel column chromatography ( $\text{H}_2\text{O}$ ) and gel filtration chromatography to give **10** (4.6 mg, 2.82  $\mu\text{mol}$ , 84% yield). White solid;  $R_f$  0.30 (10/10/3  $\text{CHCl}_3/\text{MeOH}/\text{H}_2\text{O}$ ); m.p.  $>300$   $^{\circ}\text{C}$ ;  $[\alpha]_D^{28} -89.1^{\circ}$  ( $c$  1.0,  $\text{H}_2\text{O}$ );  $^1\text{H-NMR}$  (500 MHz,  $\text{D}_2\text{O}$ )  $\delta$  5.33-5.31 (2H, m, H-1' or 1'' or 1''' $\times$ 2), 5.28 (1H, d,  $J = 3.5$  Hz, H-1' or 1'' or 1'''), 4.95 (1H, br-d,  $J_{3'',4''} = 3.0$  Hz, H-4'''), 4.83-4.77 (3H, m, H-3', 3'', 3'''), 4.70-4.65 (2H, m, H-2' or 2'' or 2''' $\times$ 2), 4.60-4.45 (5H, m, H-1, H-2' or 2'' or 2''', H-5 or 5' or 5'' or 5''' $\times$ 3), 4.39-4.37

(2H, m, H-2, H-3), 4.31-4.27 (2H, m, H-4', 4''), 4.24-4.22 (1H, m, H-4), 3.88-3.78 (2H, m, H-5 or 5' or 5'' or 5''', -OCH<sub>2</sub>CH<sub>2</sub>-), 3.66-3.60 (1H, m, -OCH<sub>2</sub>CH<sub>2</sub>-), 1.62-1.55 (2H, m, -OCH<sub>2</sub>CH<sub>2</sub>-), 1.44-1.22 (22H, m), 0.83 (3H, t,  $J = 7.0$  Hz, -OC<sub>7</sub>H<sub>14</sub>CH<sub>3</sub>); <sup>13</sup>C-NMR (125 MHz, D<sub>2</sub>O)  $\delta$  101.8, 99.4, 80.9, 80.5, 80.3, 79.1, 78.2, 76.5, 74.2, 73.5, 73.4, 73.3, 73.0, 71.6, 71.4, 68.9, 67.6, 31.8, 29.4, 29.2, 29.1, 25.6, 22.7, 16.4 $\times$ 2, 16.1 $\times$ 2, 14.1; HRMS (ESI-TOF)  $m/z$  1654.8132 (1654.8060 calcd. for C<sub>32</sub>H<sub>49</sub>O<sub>44</sub>S<sub>9</sub>Na<sub>10</sub>, [M+Na]<sup>+</sup>).

## **Materials and methods for biological assay**

His-tagged SARS-CoV-2 S1+S2 protein was purchased from Sino Biological Inc. (China). Streptavidin-coated biosensor was purchased from Fortebio (U.S.A.). Biolayer interferometry system was measured by BLItz (Fortebio). Biotinylated heparin (11 kDa) was purchased from PG Research (Japan). Bovine serum albumin (BSA) and fondaparinux were purchased from Sigma-Aldrich Co. LLC. (Japan). BIOPHEN™ ANTI-Xa (2 Stages Heparin Assay) kit was purchased from Hyphen BioMed (France).

## **Expression and purification of recombinant spike proteins**

The codon-optimized gene of SARS-CoV-2 S protein (GenBank: QHD43416) was designed for expression in mammalian cells and synthesized from GeneArt DNA Synthesis (Thermo). For expression of recombinant S protein, the sequence encoding the S ectodomain (residues 1 - 1208) with proline substitutions at residues 986 and 987, a “GSAS” substitution at furin cleavage site (residues 682 - 685), and C-terminal foldon trimerization motif followed by an octa-histidine tag was cloned into a pcDNA3.1 expression vector (Invitrogen). Further, S protein mutations occurring in the B.1.1.7 variant ( $\Delta$ 69-70,  $\Delta$ 144, N501Y, A570D, D614G, P681H, T716I, S982A, D1118H), B.1.351 variant (D80A, D215G, K417N, E484K, N501Y, D614G, A701V), and P.1 variant (L18F, T20N, P26S, D138Y, R190S, K417T, E484K, N501Y, H655Y, T1027I) were introduced by inverse PCR method.

Recombinant S proteins were transiently expressed in Expi293f cells (Thermo) maintained in HE400AZ medium (Gmep, Japan). The expression vector was transfected by using Gxpress 293 Transfection Kit (Gmep, Japan) as following manufacturer's protocol. After 5 days post transfection, culture supernatants were harvested, and His-tagged S proteins were purified by Ni<sup>2+</sup> affinity chromatography using Ni Sepharose 6 Fast Flow (Cytiva), followed by size exclusion chromatography using Superdex 200 Increase 10/300 GL (Cytiva).

## **Binding affinity of heparin to wild type SARS-CoV-2 S protein**

Streptavidin-coated biosensor was hydrated in phosphate buffered saline (PBS, 137 mM NaCl, 8.1 mM Na<sub>2</sub>HPO<sub>4</sub>, 2.68 mM KCl, 1.47 mM KH<sub>2</sub>PO<sub>4</sub>, pH 7.4) containing 0.02% BSA for 10 minutes. Next, biotinylated heparin (0, 22.7, 45.5, 90.9, and 181.8 nM in 0.02% BSA/PBS) was loaded on streptavidin biosensors for 120 s placed in the drop holder. The loaded sensor tips were dipped into the solution of SARS-CoV-2 S protein (1  $\mu$ M in 0.02% BSA/tris buffered saline (TBS, 20 mM Tris, 150 mM NaCl, pH 7.4)) for 300 s from the drop holder position. Finally, biosensor was exposed to 0.02% BSA/TBS for 120 s from the tube position. The dissociation constant ( $K_d$ ) was generated by fitting 1:1 Langmuir model.

### **Competitive inhibition assay**

Streptavidin-coated biosensor was hydrated in 0.02% BSA/PBS for 10 minutes. Next, biotinylated heparin (181.8 nM in 0.02% BSA/PBS or 0 nM as control) was loaded on streptavidin biosensors for 120 s placed in the drop holder. The loaded sensor tips were dipped into the solution of SARS-CoV-2 S protein (1  $\mu$ M) and fucoidan derivatives **1-13**, or fondaparinux (**24**) (50  $\mu$ M) in 0.02% BSA/TBS for 300 s from the drop holder position. Finally, biosensor was exposed to 0.02% BSA/TBS for 120 s from the tube position. The inhibition rate was evaluated by the decrease of signal.

### **Binding affinities of heparin to mutant SARS-CoV-2 S proteins**

Streptavidin-coated biosensor was hydrated in 0.02% BSA/PBS for 10 minutes. Next, biotinylated heparin (181.8 nM in 0.02% BSA/PBS or 0 nM as control) was loaded on streptavidin biosensors for 120 s placed in the drop holder. Next, the loaded sensor tips were dipped into the solution of mutant SARS-CoV-2 S protein derived from B.1.1.7, B.1.351 and P.1 (0.125, 0.25, 0.5, and 1  $\mu$ M) in 0.02% BSA/TBS for 300 s (for P.1) or 120 s (for B.1.1.7 and B.1.351) from the drop holder position. Finally, biosensor was exposed to 0.02% BSA/TBS for 120 s from the tube position. Global fitting of these data to a 1:1 binding model using the BLItz Pro 1.3 software gave dissociation constant ( $K_d$ ) for heparin to several mutant SARS-CoV-2 S proteins.

### **Binding affinities of **10** to mutant SARS-CoV-2 S proteins**

Streptavidin-coated biosensor was hydrated in 0.02% BSA/PBS for 10 minutes. Next, biotinylated heparin (181.8 nM in 0.02% BSA/PBS or 0 nM as control) was loaded on streptavidin biosensors for 120 s placed in the drop holder. Next, the loaded sensor tips were dipped into the solution of several SARS-CoV-2 S protein derived from wild type, B.1.1.7, B.1.351 and P.1 (1  $\mu$ M) and **10** (0-500  $\mu$ M) in 0.02% BSA/TBS for 300 s (for wild type and P.1) or 120 s (for B.1.1.7 and B.1.351) from the drop holder position. Finally, biosensor was exposed to 0.02% BSA/TBS for 120 s.  $IC_{50}$  values were calculated based on the decrease of signal using GraphPad Prism software. Inhibition constant ( $K_i$ ) of **10** to several SARS-CoV-2 S proteins were calculated based on the  $IC_{50}$  values according to the Cheng-Prusoff equation<sup>3</sup>.

### **Coagulation (Factor Xa) assay**

The anti-factor Xa activity were measured using BIOPHEN<sup>TM</sup> ANTI-Xa (2 Stages Heparin Assay) kit containing R1, R2 and R3 solutions. 40  $\mu$ L of R1 solution containing 0.5 IU mL<sup>-1</sup> antithrombin III and 40  $\mu$ L of **10** or fondaparinux (**24**) (0.001-10  $\mu$ g mL<sup>-1</sup>) in Tris-EDTA buffer (50 mM Tris, 175 mM NaCl, 7.5 mM EDTA, 0.1% PEG, 0.9 g/L NaN<sub>3</sub>, pH 8.4) were mixed in 96-well plate and incubated for 2 min at 37 °C. And then, 40  $\mu$ L of R2 solution containing 4  $\mu$ g

mL<sup>-1</sup> factor Xa was added into the plate and incubated for 2 min at 37 °C. After incubation for 2 min, 40 µL of R3 solution containing 0.4 mg mL<sup>-1</sup> factor Xa specific chromogenic substrate was added and incubated exactly 2 min at 37 °C, and then the reaction was stopped by adding 80 µL of citric acid (20 g L<sup>-1</sup>). The absorbance was measured at 405 nm using SpectraMax i3 (Molecular Devices) micro plate reader.

## **References**

- 1) A. Kasai, S. Arafuka, N. Koshihara, D. Takahashi and K. Toshima, *Org. Biomol. Chem.*, 2015, **13**, 10556.
- 2) S. Arafuka, N. Koshihara, D. Takahashi and K. Toshima, *Chem. Commun.*, 2014, **50**, 9831.
- 3) Y. Cheng and W. H. Prusoff, *Biochem. Pharmacol.*, 1973, **22**, 3099.



**NMR**  
**spectrum charts**

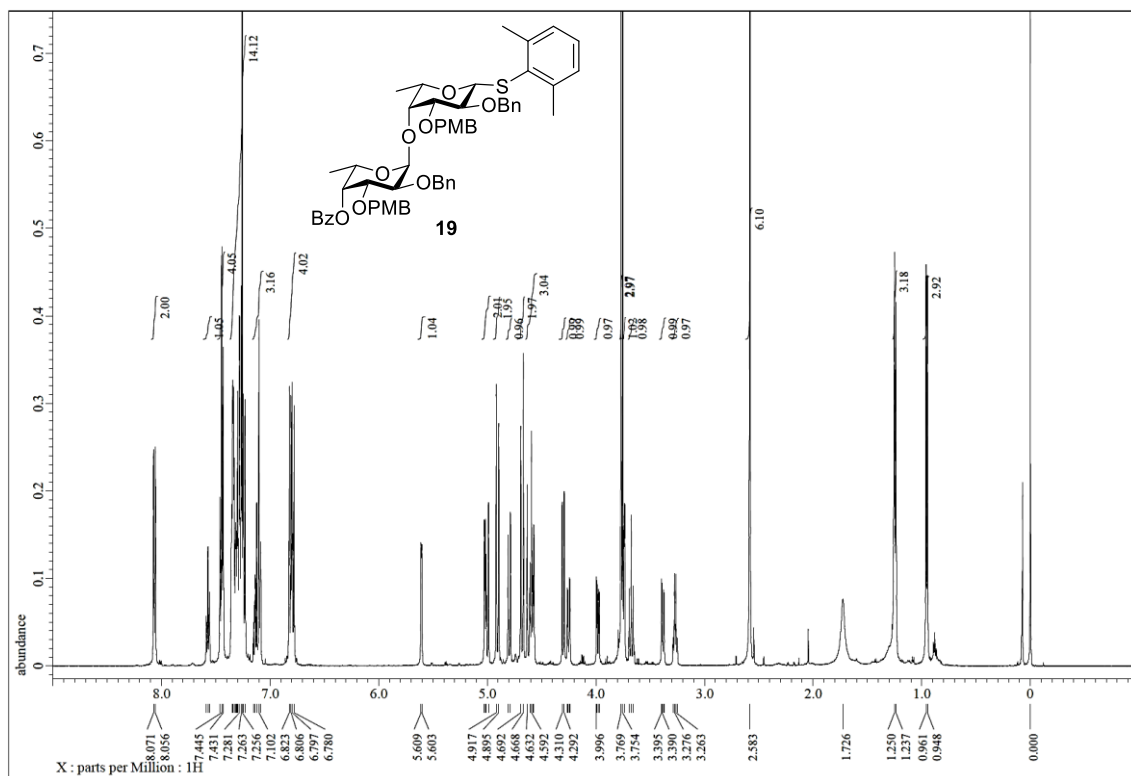

Fig. S1  $^1\text{H}$ -NMR spectrum of 19

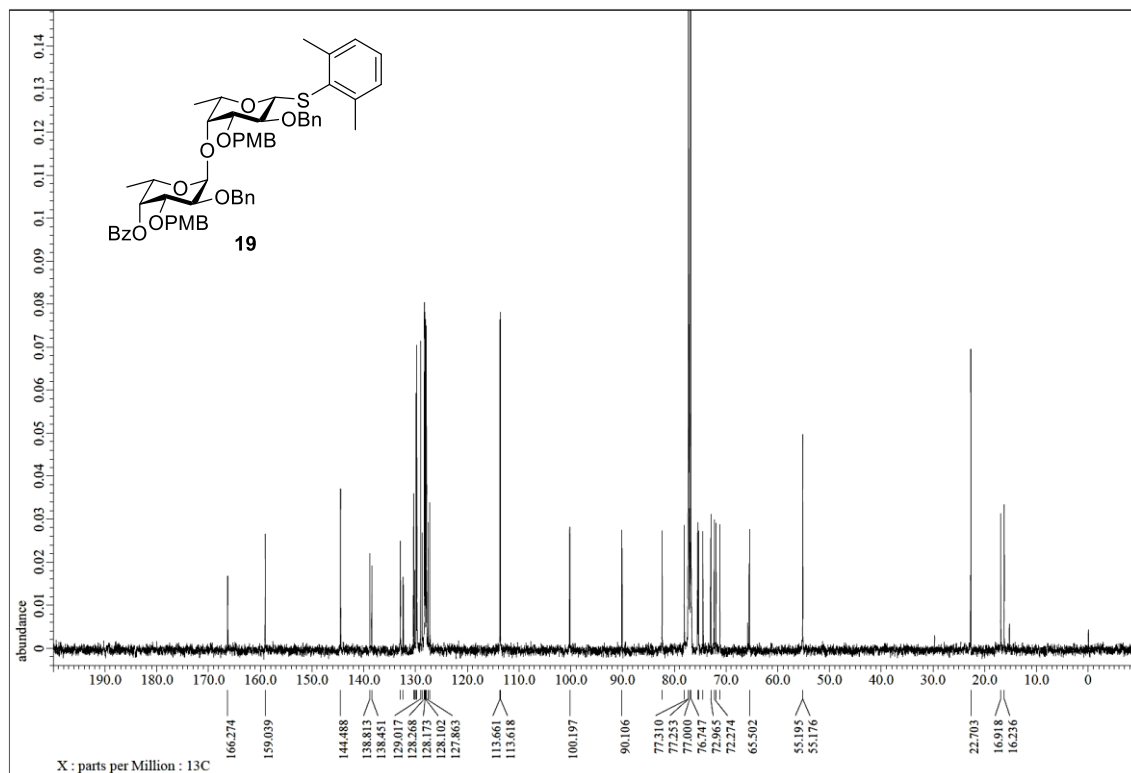

Fig. S2  $^{13}\text{C}$ -NMR spectrum of 19

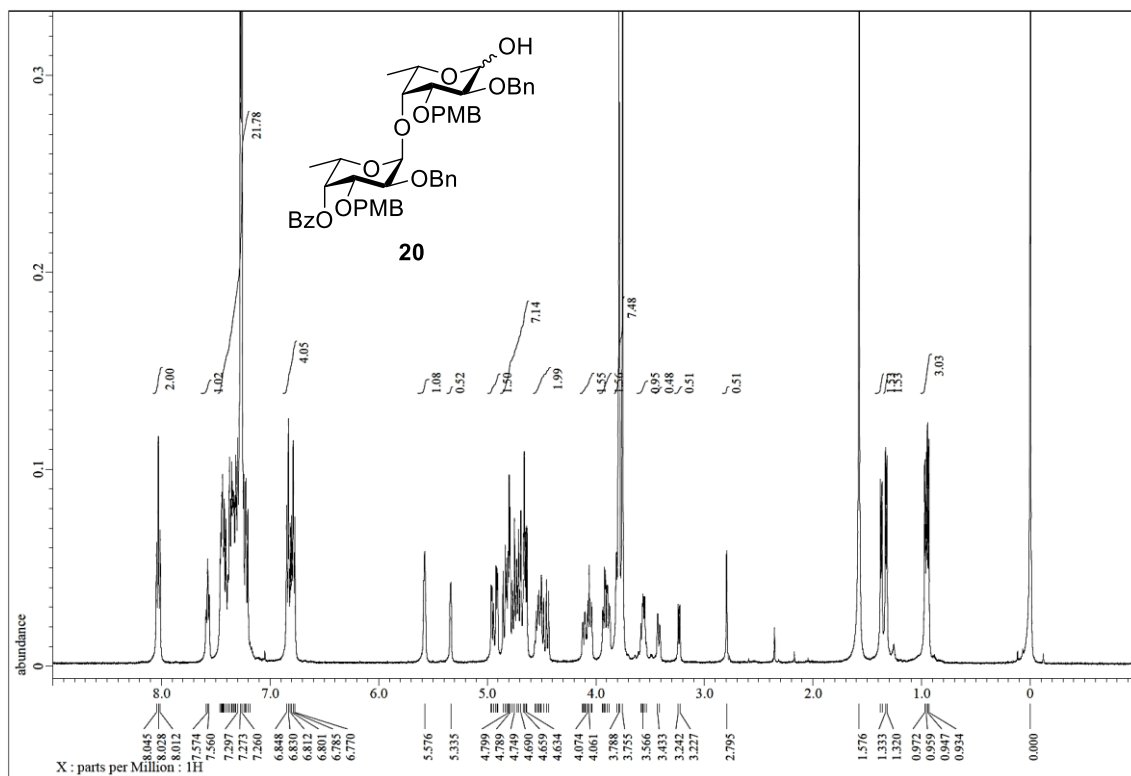

Fig. S3  $^1\text{H-NMR}$  spectrum of **20**

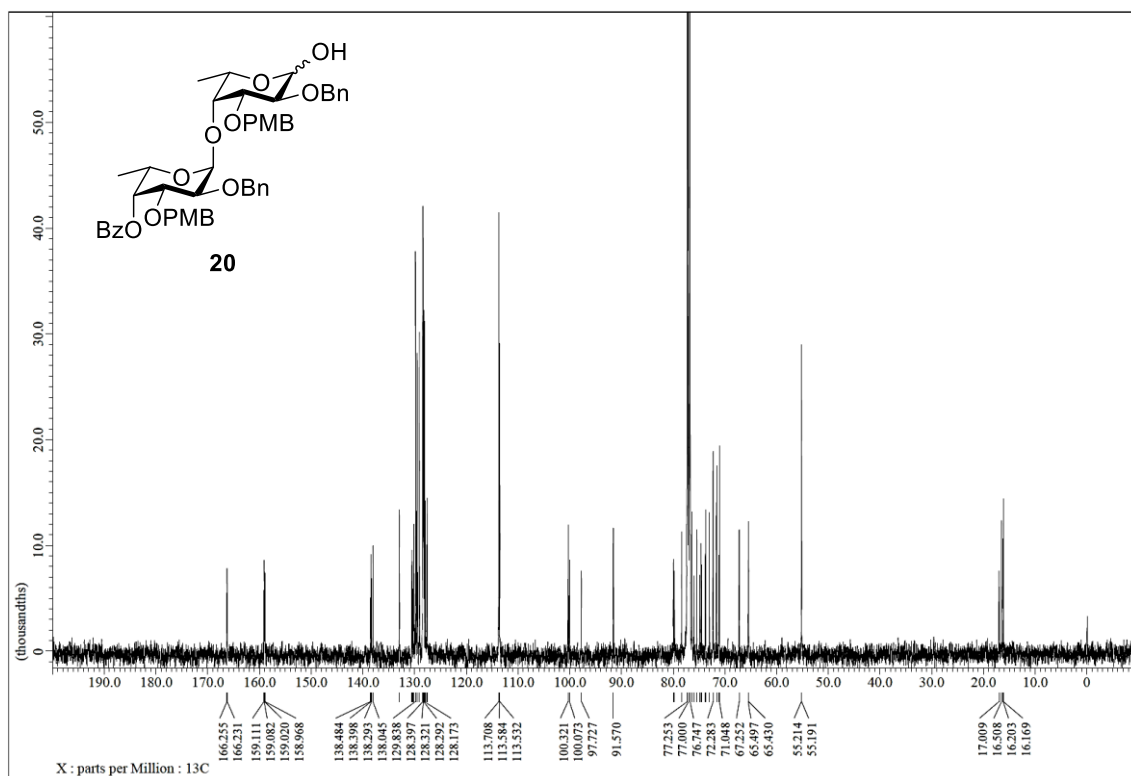

Fig. S4  $^{13}\text{C-NMR}$  spectrum of **20**

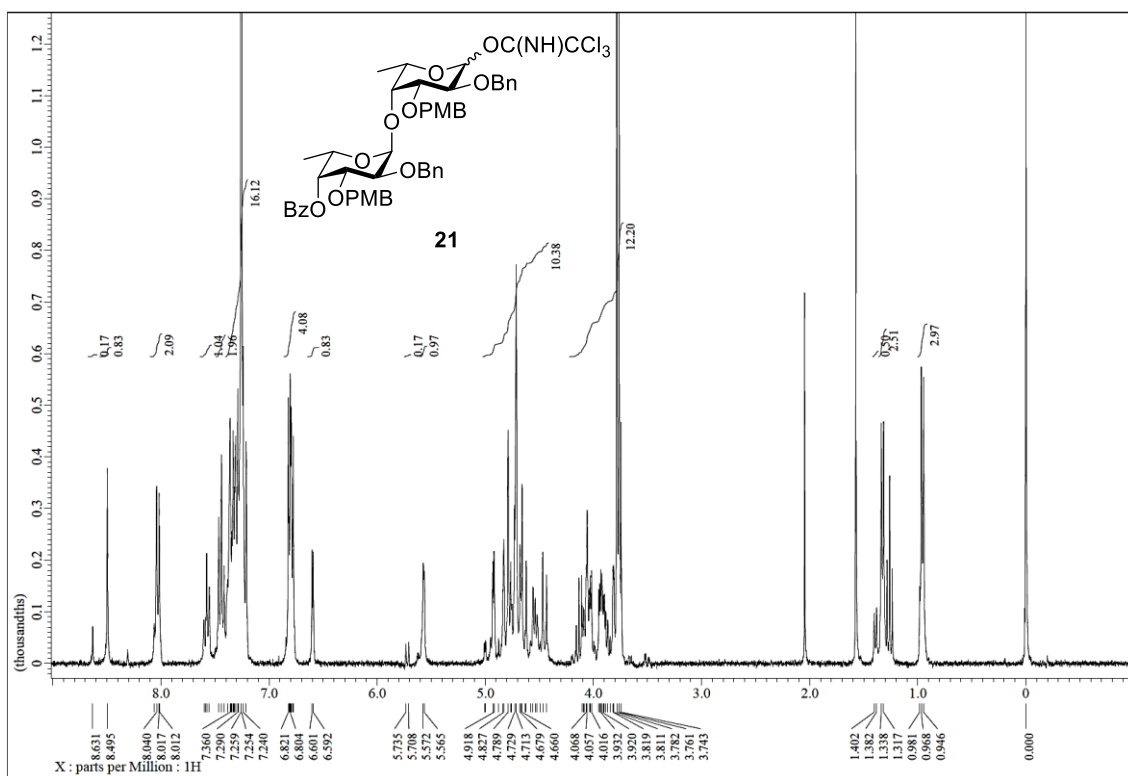

**Fig. S5** <sup>1</sup>H-NMR spectrum of **21**

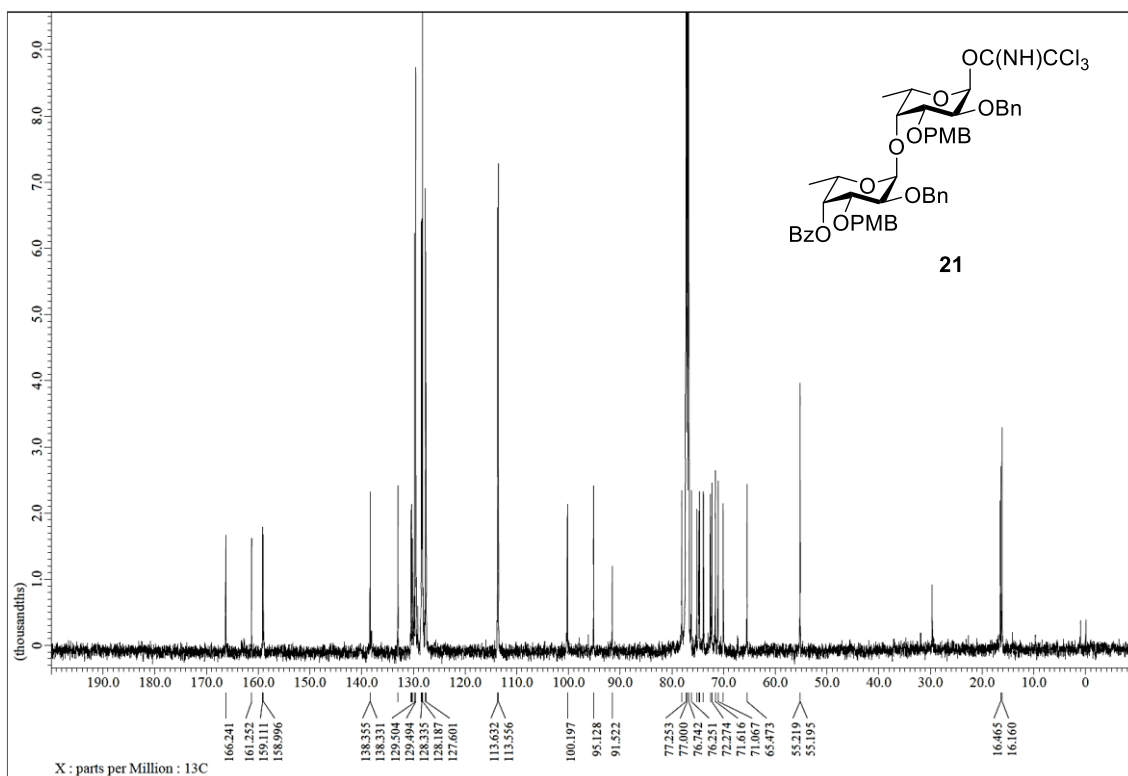

**Fig. S6** <sup>13</sup>C-NMR spectrum of **21**

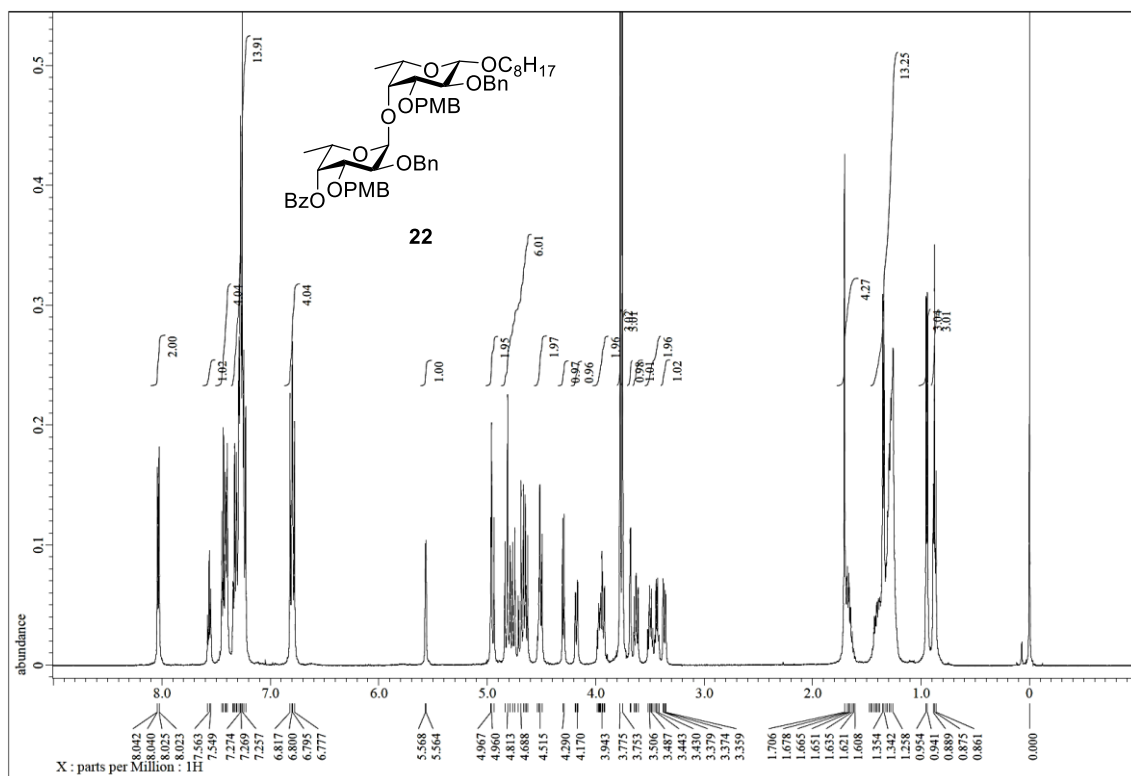

Fig. S7 <sup>1</sup>H-NMR spectrum of **22**

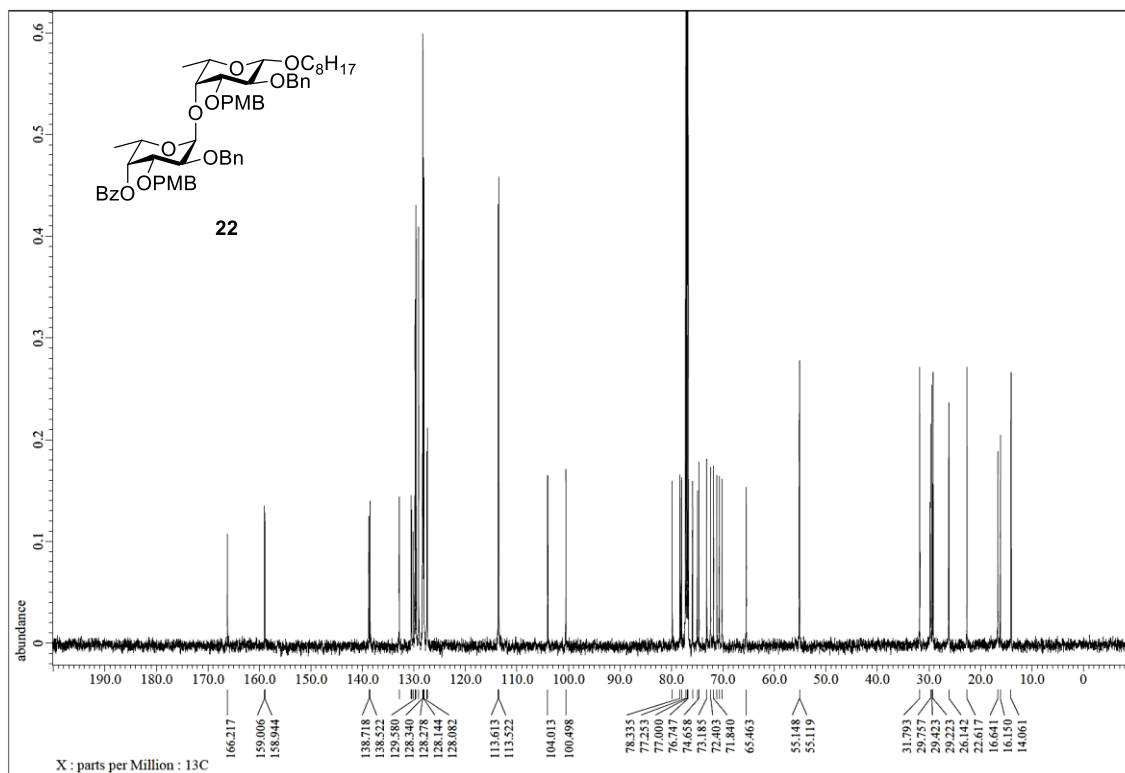

Fig. S8 <sup>13</sup>C-NMR spectrum of **22**

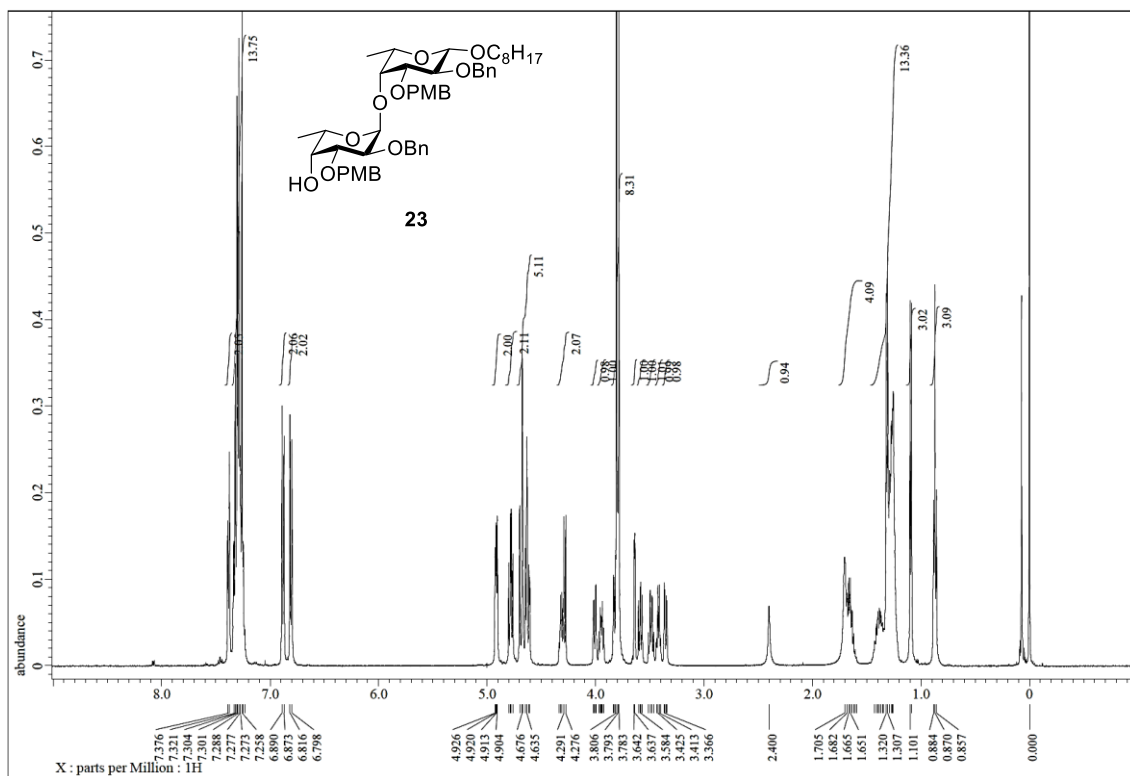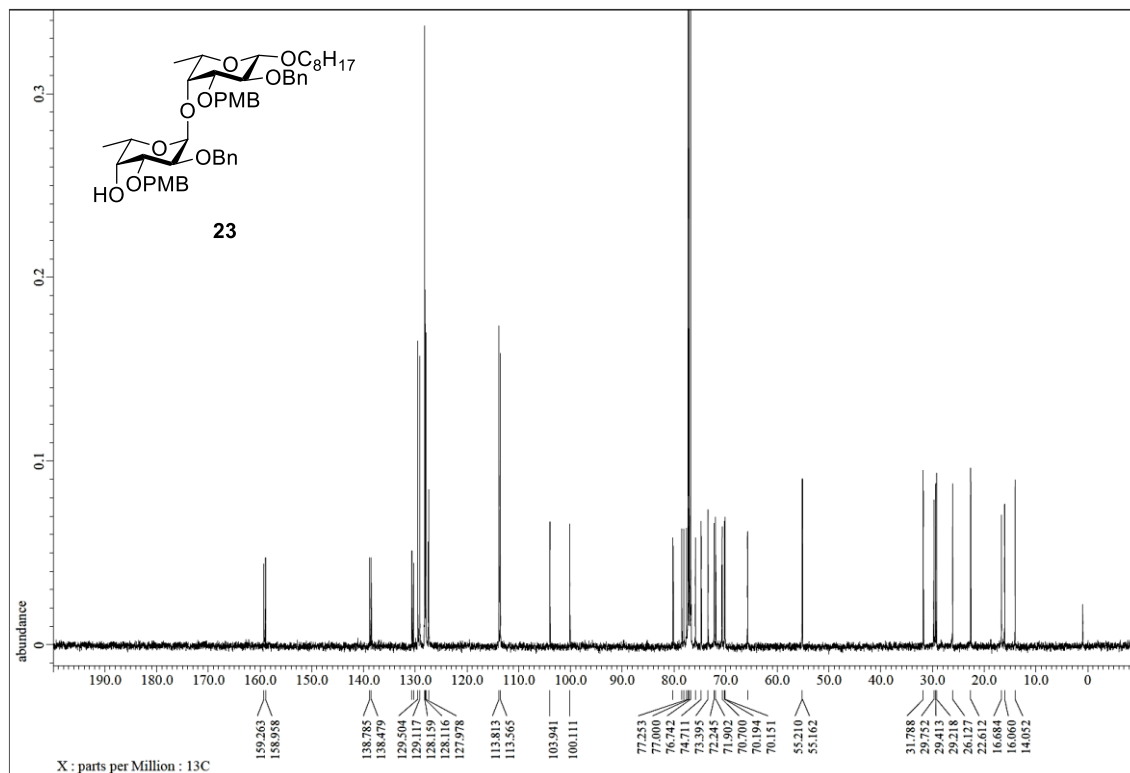









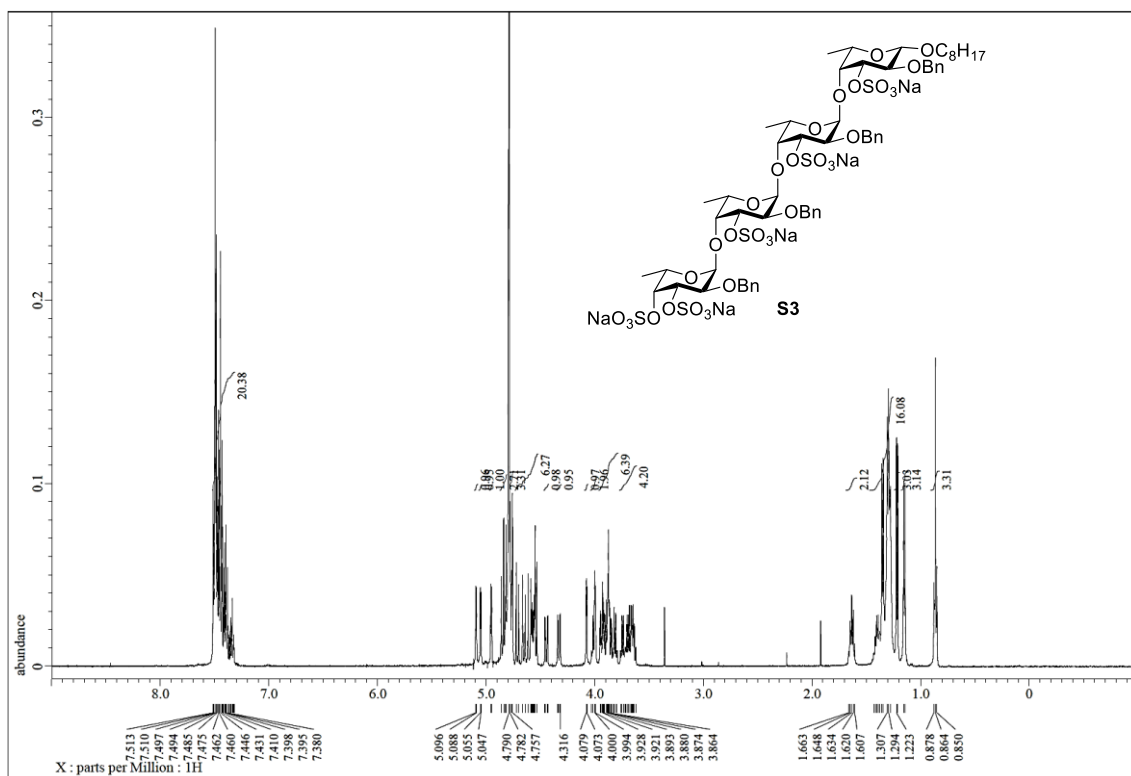

Fig. S17 <sup>1</sup>H-NMR spectrum of S3

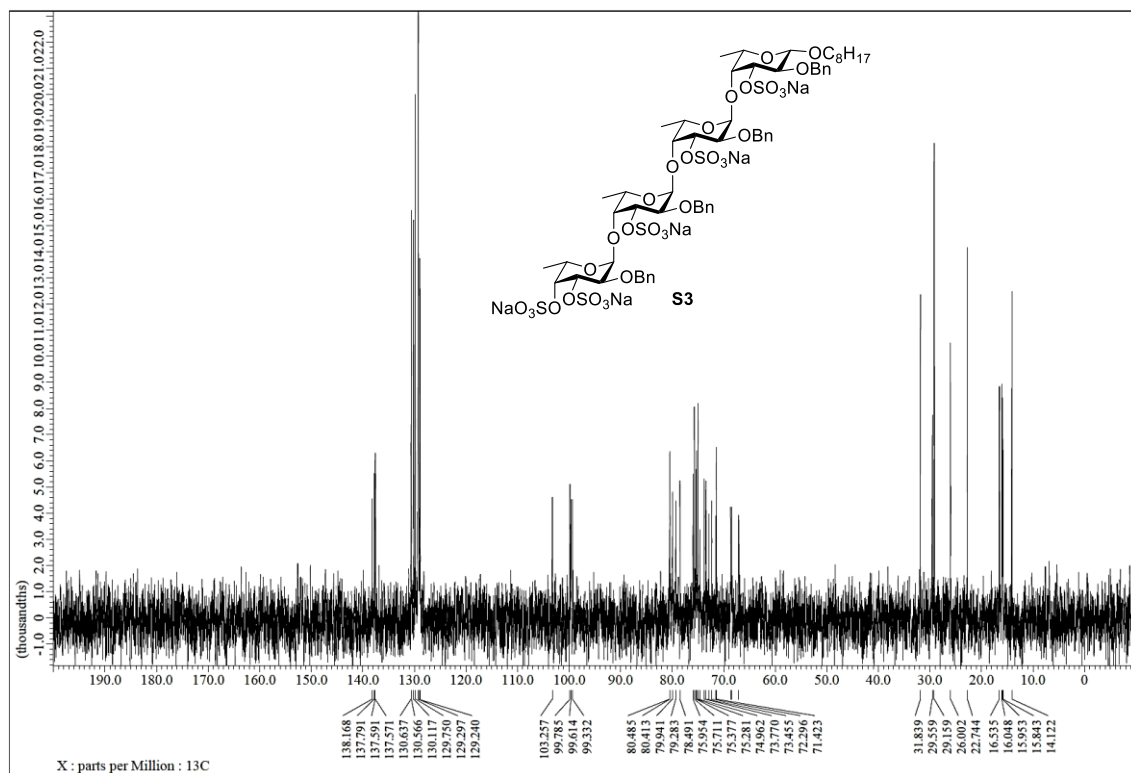

Fig. S18 <sup>13</sup>C-NMR spectrum of S3

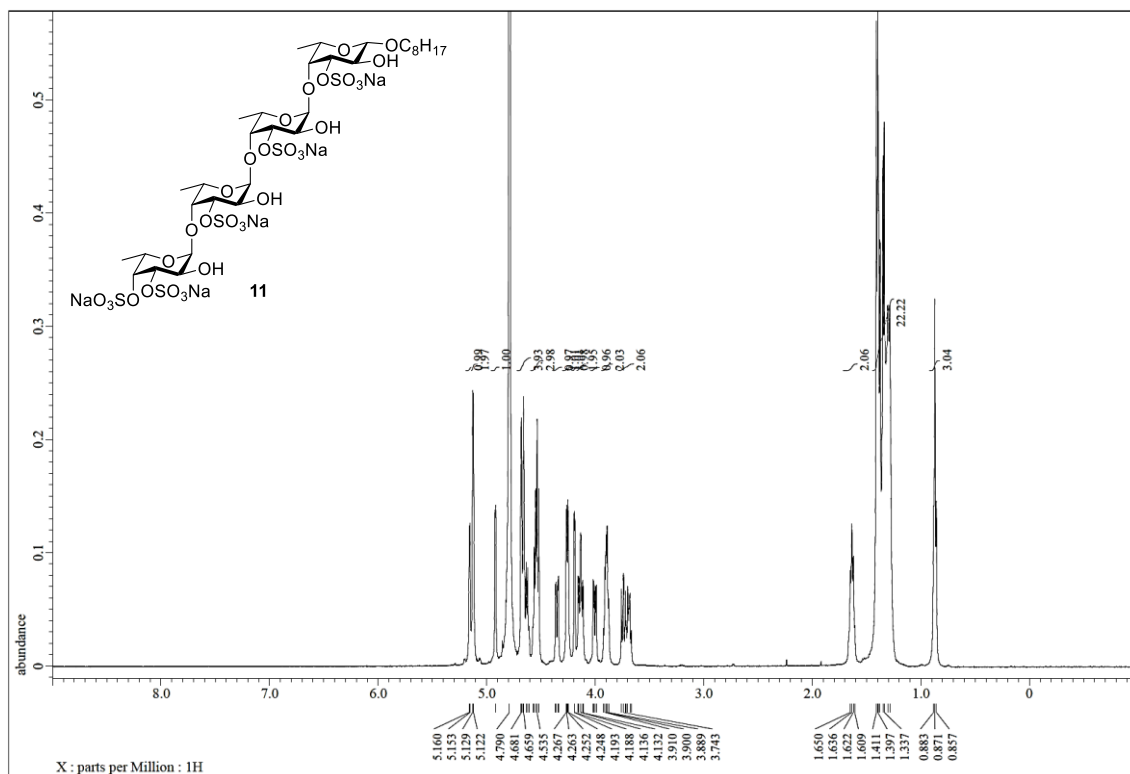

Fig. S19  $^1\text{H}$ -NMR spectrum of 11

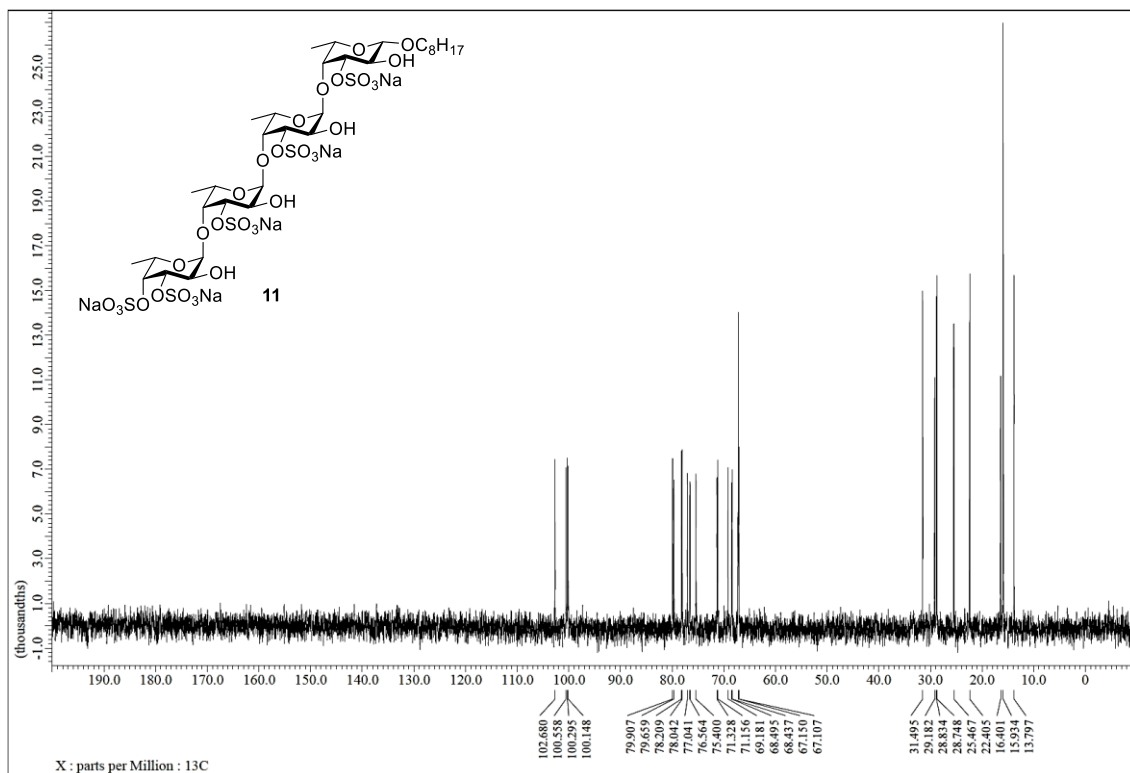

Fig. S20  $^{13}\text{C}$ -NMR spectrum of 11



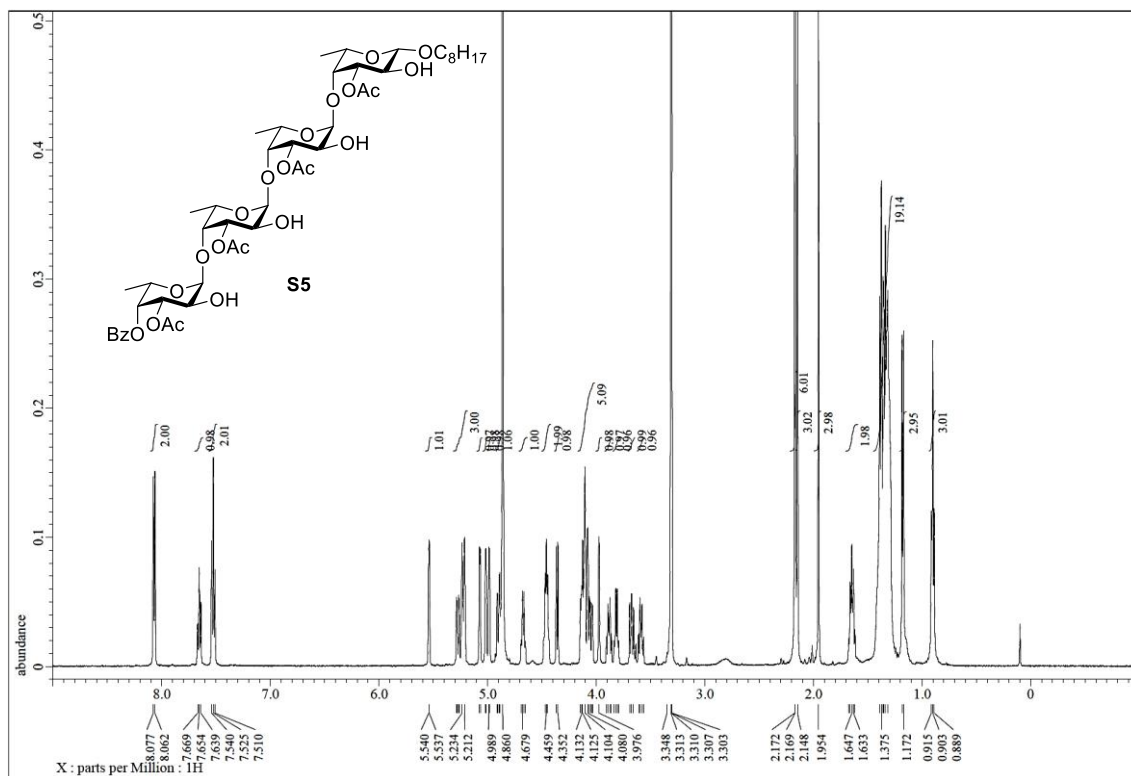

Fig. S23 <sup>1</sup>H-NMR spectrum of S5

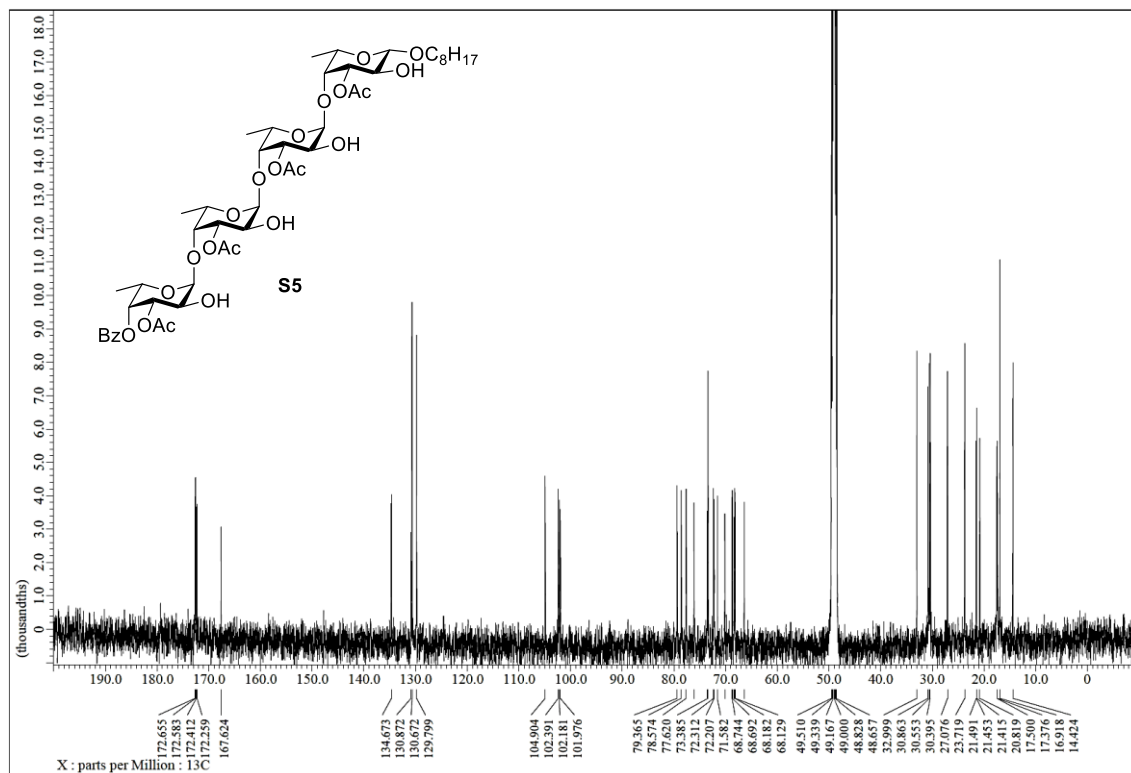

Fig. S24 <sup>13</sup>C-NMR spectrum of S5

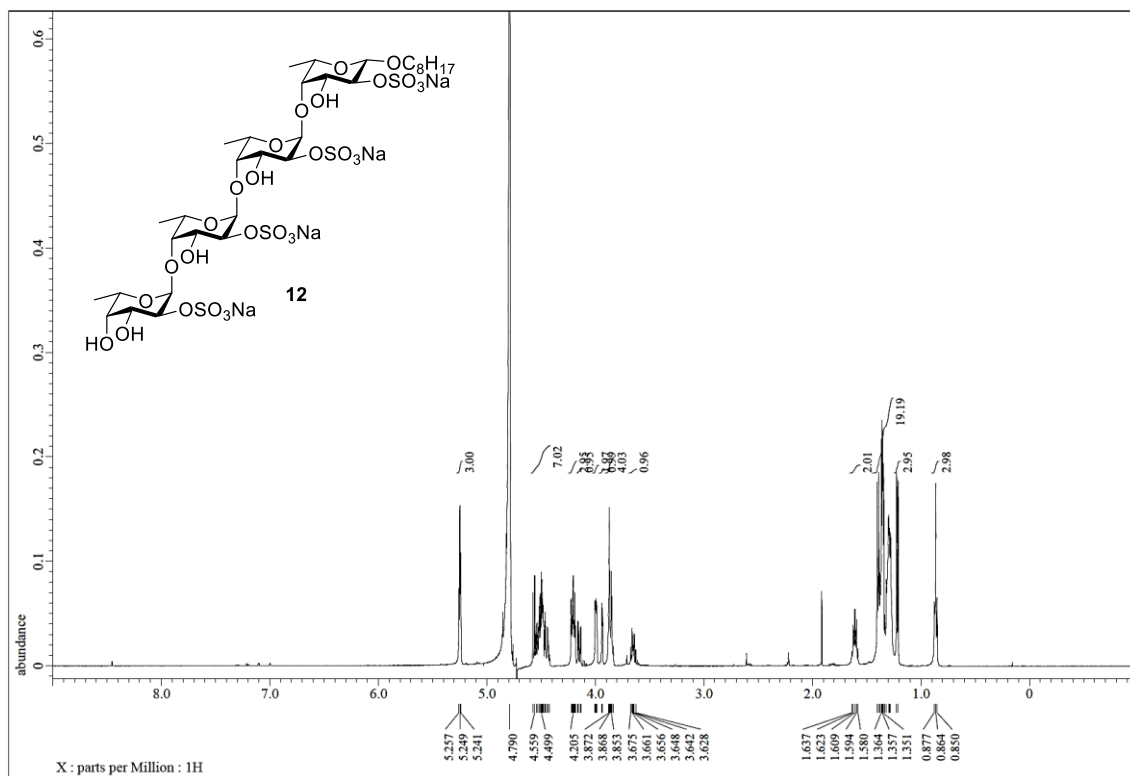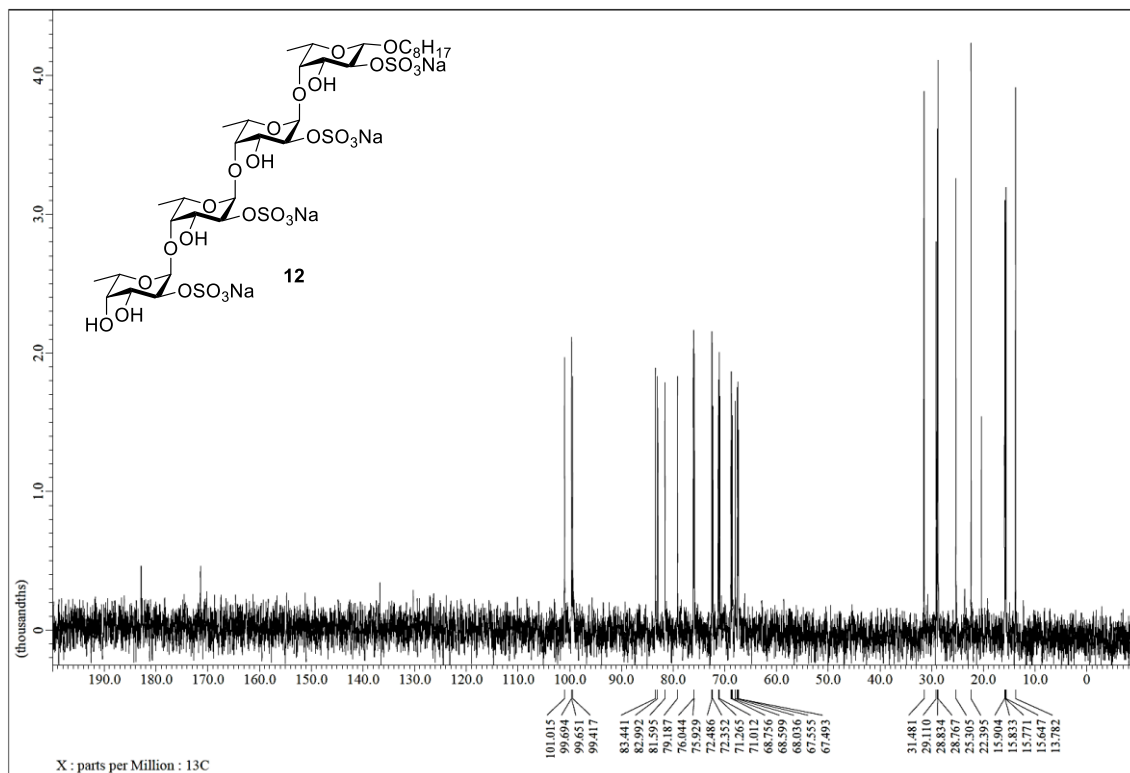

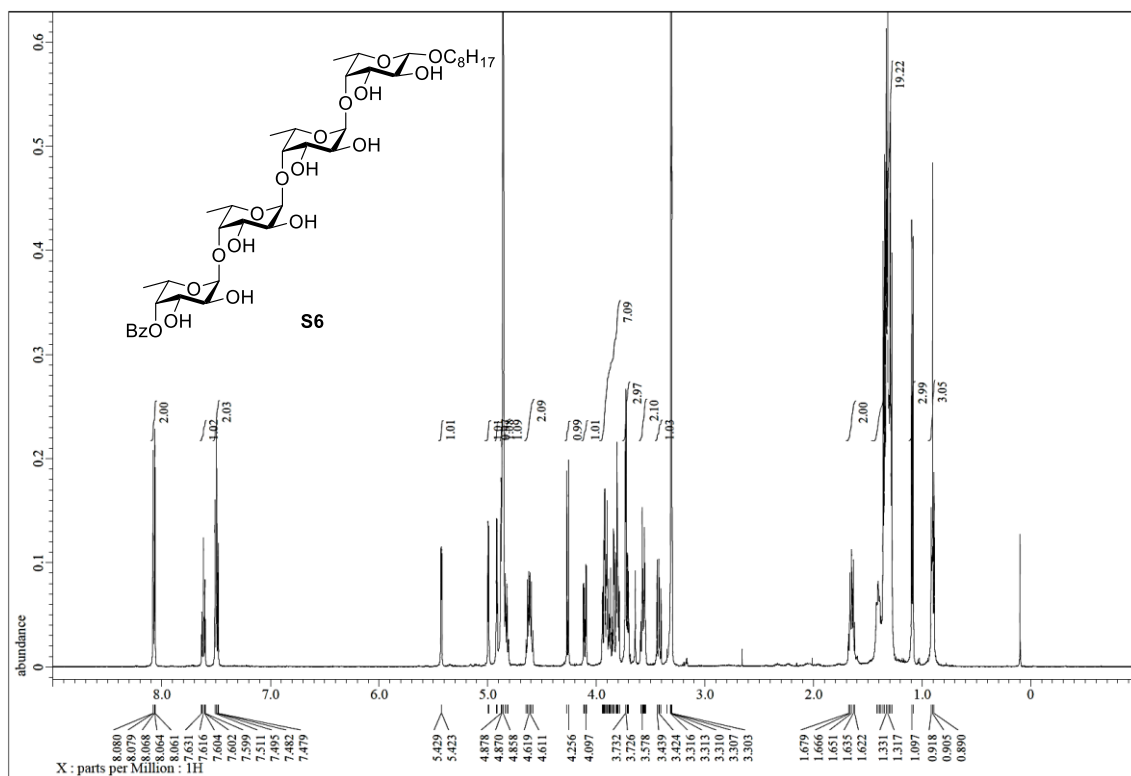

**Fig. S27 <sup>1</sup>H-NMR spectrum of S6**

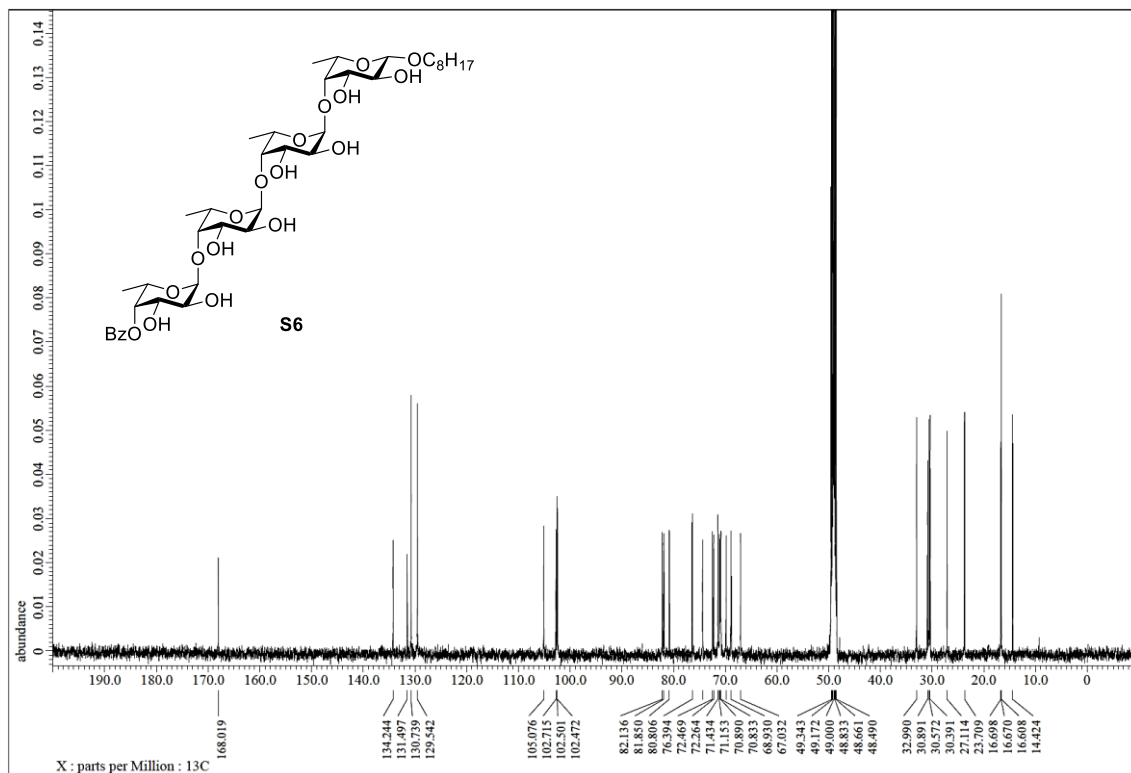

**Fig. S28 <sup>13</sup>C-NMR spectrum of S6**

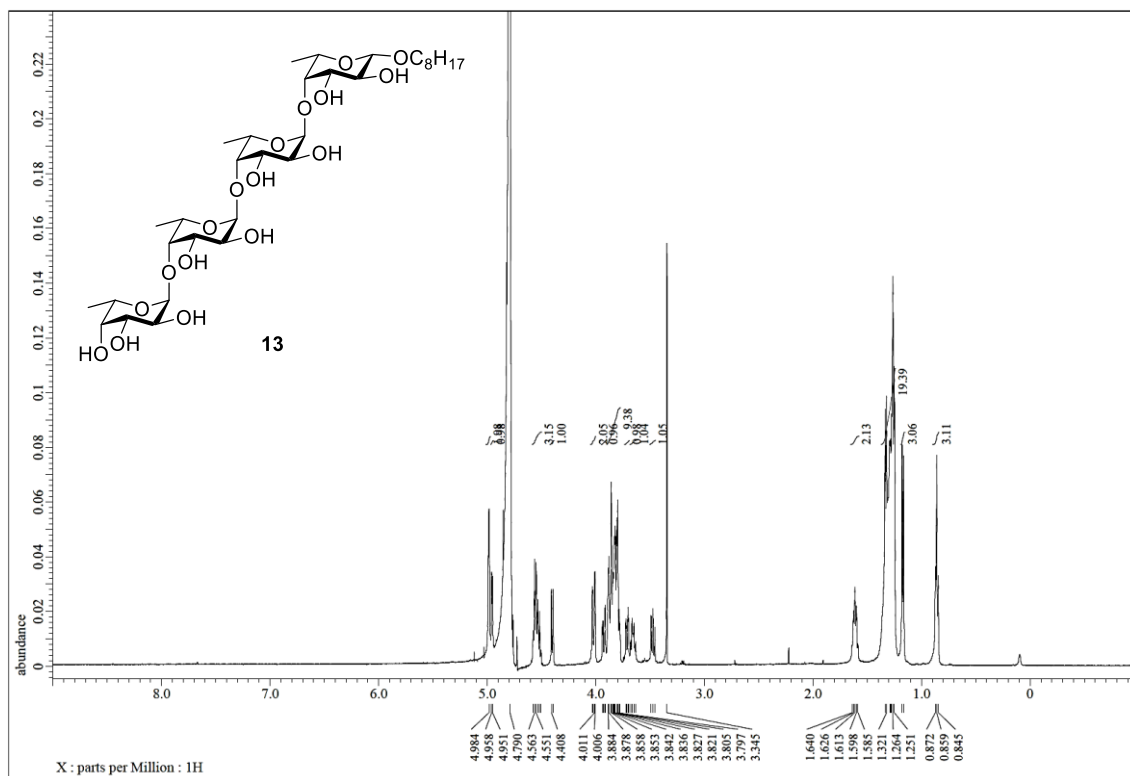

Fig. S29 <sup>1</sup>H-NMR spectrum of 13

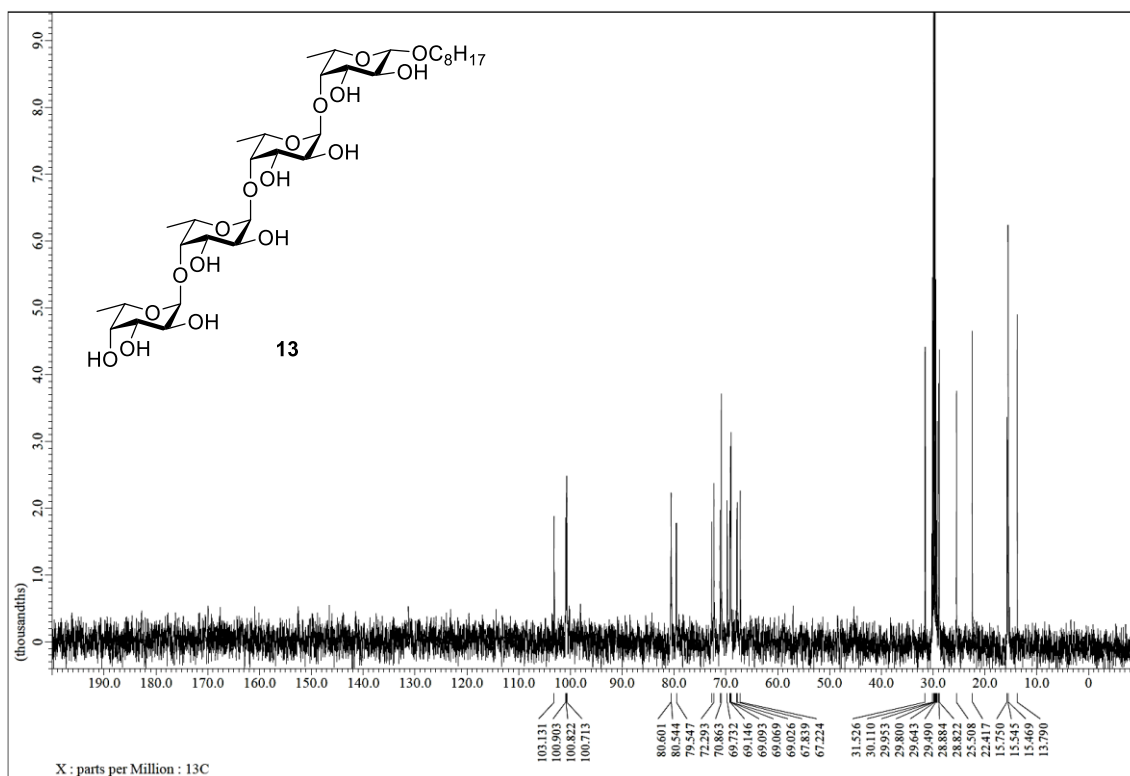

Fig. S30 <sup>13</sup>C-NMR spectrum of 13



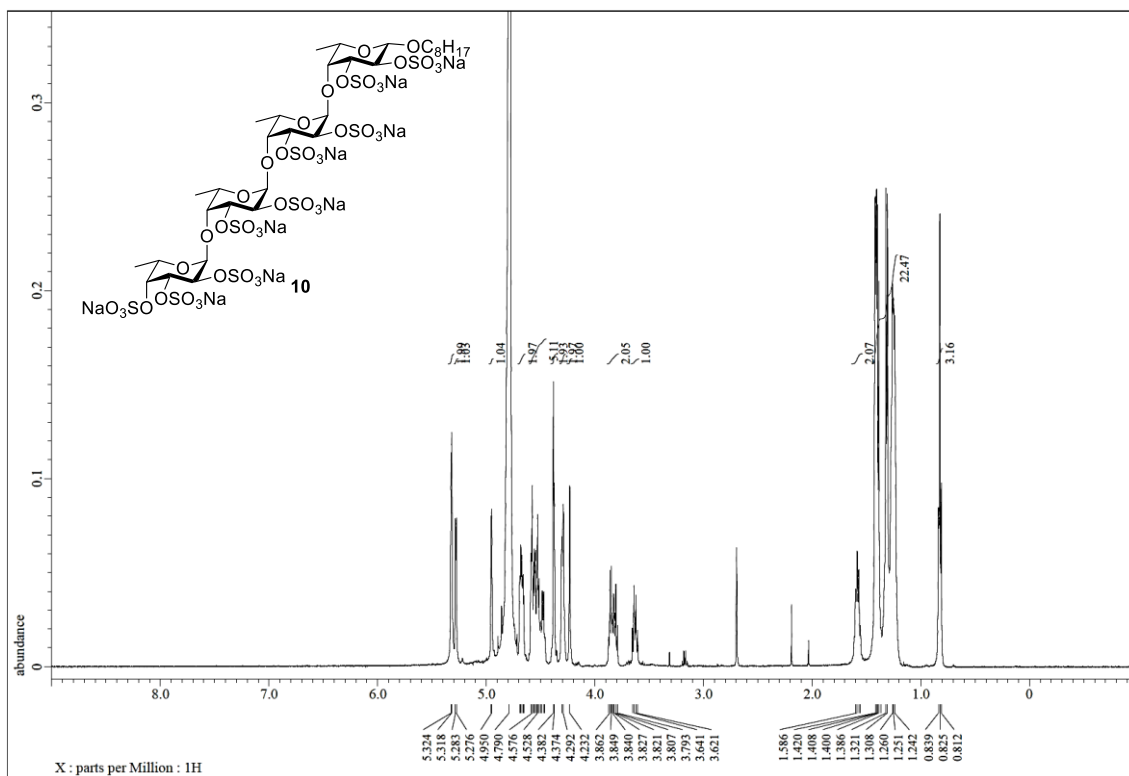

Fig. S31  $^1\text{H-NMR}$  spectrum of **10**

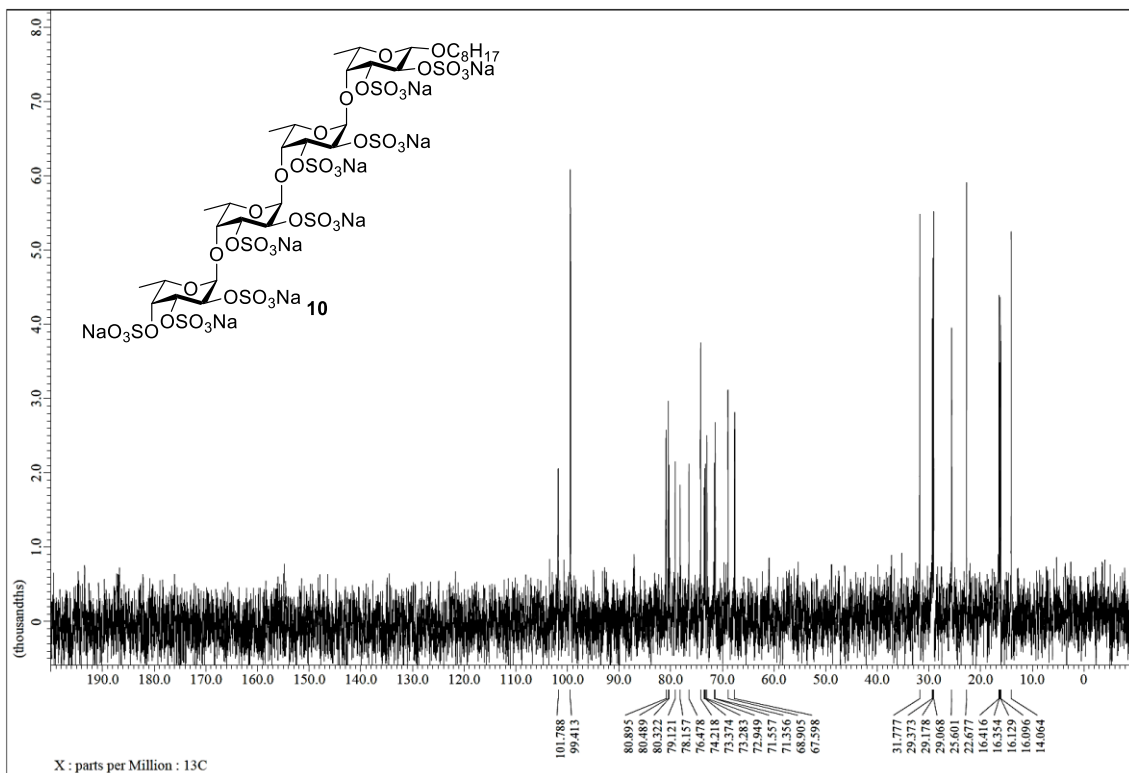

Fig. S32  $^{13}\text{C-NMR}$  spectrum of **10**
